# Supplementary material for: scRNA-Seq of Cultured Human Amniotic Fluid from Fetuses with Spina Bifida Reveals the Origin and Heterogeneity of the Cellular Content
Source: Cells. 2023 Jun 7;12(12):1577. doi: 10.3390/cells12121577 (PMC10296558; doi:10.3390/cells12121577)
Supplement: Supplementary file 1 [file cells-12-01577-s001.zip › cells-2106972-supplementary/Table_S2.xlsx]

## Sheet: Sheet1
Table S2. Marker genes for each cell type detected in cultured AF at passage 0.
Expression differences of cluster marker genes
Numeric values are rounded to 4 digits.
gene	cluster	pct.1	pct.2	avg_log2FC	p_val_adj	diff_pct
VEGFC	NPC	0.789	0.358	25.4607	0	0.431
FOXC2	NPC	0.761	0.392	4.07754	0	0.369
PRSS3	NPC	0.575	0.229	7.426	0	0.346
F2R	NPC	0.803	0.461	9.79015	0	0.342
NRGN	NPC	0.47	0.161	0.579301	0	0.309
SLC9A3R2	NPC	0.732	0.439	5.25477	0	0.293
MND1	NPC	0.56	0.268	1.0308	0	0.292
LMO7	NPC	0.668	0.389	0.86901	0	0.279
SVIP	NPC	0.769	0.493	1.3762	0	0.276
TXNRD2	NPC	0.606	0.331	3.32755	0	0.275
PSMC3IP	NPC	0.578	0.304	0.975231	5.64608e-292	0.274
SERINC2	NPC	0.596	0.33	1.15258	0	0.266
RFC4	NPC	0.611	0.35	2.07303	0	0.261
STC1	NPC	0.602	0.342	64.4108	1.00714e-212	0.26
TIPIN	NPC	0.545	0.287	1.27436	8.36474e-292	0.258
VEPH1	NPC	0.411	0.153	0.915945	0	0.258
MCUB	NPC	0.68	0.424	1.77678	0	0.256
FBXO5	NPC	0.612	0.356	7.60066	0	0.256
GINS2	NPC	0.77	0.515	1.53557	0	0.255
GEMIN6	NPC	0.638	0.386	1.68016	4.04754e-295	0.252
CDCA3	NPC	0.657	0.405	1.42123	2.03671e-188	0.252
FH	NPC	0.694	0.442	0.826481	0	0.252
TMEM173	NPC	0.416	0.165	0.919664	0	0.251
GAMT	NPC	0.596	0.346	1.77887	0	0.25
MCM5	NPC	0.692	0.443	0.360409	2.25547e-240	0.249
CDC45	NPC	0.487	0.239	0.702297	5.38658e-290	0.248
CCNH	NPC	0.578	0.33	6.94626	0	0.248
SIX1	NPC	0.323	0.077	3.16714	0	0.246
FST	NPC	0.351	0.105	41.3361	1.78602e-188	0.246
EXOSC9	NPC	0.632	0.387	1.49229	4.13829e-292	0.245
SPC25	NPC	0.575	0.33	1.06013	4.92167e-176	0.245
CDT1	NPC	0.567	0.323	1.42638	5.6252e-238	0.244
FAM216A	NPC	0.474	0.232	1.0459	2.36409e-300	0.242
LRR1	NPC	0.671	0.43	1.27287	1.15679e-274	0.241
F2RL2	NPC	0.307	0.066	0.963925	0	0.241
MCM6	NPC	0.586	0.345	0.791705	1.30014e-238	0.241
MCM10	NPC	0.538	0.3	0.679729	1.71032e-208	0.238
HOXA7	NPC	0.58	0.342	1.1667	3.99577e-233	0.238
FEN1	NPC	0.706	0.469	1.26276	1.22317e-291	0.237
ASF1A	NPC	0.572	0.335	8.21669	2.72424e-291	0.237
BNC2	NPC	0.397	0.161	0.860973	0	0.236
TK1	NPC	0.84	0.604	1.88932	0	0.236
TRAP1	NPC	0.682	0.447	1.42823	2.22887e-282	0.235
TLE4	NPC	0.491	0.256	2.87417	0	0.235
GULP1	NPC	0.628	0.393	0.835101	0	0.235
EZH2	NPC	0.646	0.412	0.895618	1.95491e-207	0.234
UCK2	NPC	0.578	0.344	1.20951	1.94441e-288	0.234
MIS18A	NPC	0.634	0.4	0.8199	8.08779e-238	0.234
RFC2	NPC	0.702	0.468	0.91603	1.29144e-242	0.234
GPN3	NPC	0.622	0.389	0.741763	6.87728e-268	0.233
CFAP20	NPC	0.568	0.335	1.12488	1.7059e-272	0.233
NUCB2	NPC	0.667	0.435	0.52919	4.80457e-260	0.232
PKIA	NPC	0.571	0.339	0.927183	3.87911e-221	0.232
RPP30	NPC	0.747	0.518	1.45525	0	0.229
CNRIP1	NPC	0.591	0.362	0.632695	8.44536e-169	0.229
OXCT1	NPC	0.52	0.292	0.936663	1.93908e-260	0.228
YRDC	NPC	0.629	0.401	1.46184	1.93681e-293	0.228
CDCA4	NPC	0.642	0.415	0.584597	2.5857e-232	0.227
NCAPD3	NPC	0.526	0.3	0.824427	5.2825e-222	0.226
ASF1B	NPC	0.531	0.305	0.813096	2.00544e-188	0.226
NUF2	NPC	0.604	0.379	1.93582	1.37392e-141	0.225
DCBLD1	NPC	0.463	0.24	3.66625	1.33743e-253	0.223
HS3ST3A1	NPC	0.442	0.219	0.699898	3.61279e-239	0.223
TUBG1	NPC	0.745	0.522	1.8564	0	0.223
SAV1	NPC	0.576	0.353	0.354905	0	0.223
EXOSC3	NPC	0.711	0.488	1.71711	2.0242e-279	0.223
TMEM237	NPC	0.588	0.365	1.00132	3.28936e-212	0.223
WDR4	NPC	0.473	0.25	0.889844	2.39699e-210	0.223
IQCG	NPC	0.339	0.117	0.353099	0	0.222
NDC80	NPC	0.529	0.307	1.14177	3.96736e-130	0.222
E2F1	NPC	0.473	0.251	0.861879	6.38348e-232	0.222
CLSPN	NPC	0.816	0.595	2.01695	0	0.221
NSMCE4A	NPC	0.612	0.391	0.960642	4.12653e-175	0.221
PHGDH	NPC	0.616	0.395	12.3769	1.19983e-125	0.221
CCDC34	NPC	0.682	0.462	0.984988	2.69014e-191	0.22
PPIH	NPC	0.726	0.506	1.30526	3.72924e-231	0.22
CENPH	NPC	0.588	0.369	0.526606	5.89097e-137	0.219
EIF2B3	NPC	0.549	0.331	0.609116	1.15621e-198	0.218
KNSTRN	NPC	0.559	0.341	1.43592	4.21194e-188	0.218
FKBP11	NPC	0.59	0.372	1.07345	1.9638e-217	0.218
ITGB3BP	NPC	0.648	0.431	0.90499	3.75174e-142	0.217
UBE2T	NPC	0.87	0.653	4.32405	0	0.217
ASB1	NPC	0.496	0.279	1.02408	1.55956e-291	0.217
TMEM109	NPC	0.646	0.43	0.903134	6.02106e-222	0.216
ATAD2	NPC	0.763	0.547	3.55984	2.36232e-240	0.216
TMA16	NPC	0.678	0.463	1.10571	1.00557e-264	0.215
CREB3L2	NPC	0.573	0.358	0.532168	3.38793e-195	0.215
CDC6	NPC	0.518	0.304	0.572217	9.22922e-186	0.214
TIMM8A	NPC	0.655	0.442	1.4002	8.55279e-201	0.213
ATP8B1	NPC	0.364	0.151	0.908548	0	0.213
THAP7	NPC	0.513	0.301	0.865983	6.86018e-230	0.212
PLK1	NPC	0.676	0.464	2.91151	2.52031e-115	0.212
EXOSC8	NPC	0.814	0.602	2.07992	0	0.212
ZNRD1	NPC	0.565	0.353	1.16972	1.84563e-236	0.212
WDR18	NPC	0.68	0.469	1.50444	3.0949e-224	0.211
WDR34	NPC	0.683	0.472	0.34732	4.87876e-210	0.211
DNM3	NPC	0.337	0.126	0.861842	4.46613e-293	0.211
TMEM18	NPC	0.652	0.441	1.17738	7.27412e-243	0.211
TUSC1	NPC	0.526	0.315	1.04003	2.74721e-223	0.211
TROAP	NPC	0.466	0.255	0.818273	1.9545e-172	0.211
HACD1	NPC	0.55	0.34	0.274669	4.36493e-219	0.21
C9orf40	NPC	0.453	0.243	0.756422	2.10482e-213	0.21
EMC9	NPC	0.65	0.44	1.32219	7.78001e-201	0.21
DOHH	NPC	0.505	0.295	0.756826	1.79488e-182	0.21
EXOSC2	NPC	0.507	0.297	0.605619	1.21197e-164	0.21
KIF22	NPC	0.629	0.419	0.768482	4.35701e-129	0.21
NOP16	NPC	0.683	0.474	0.582656	1.76612e-210	0.209
RABGGTB	NPC	0.547	0.338	1.22976	1.45698e-225	0.209
UTP11	NPC	0.744	0.535	1.38345	1.1476e-303	0.209
TSEN15	NPC	0.574	0.365	0.85884	1.21362e-215	0.209
HOXA9	NPC	0.598	0.389	2.34718	1.73398e-161	0.209
PSMG1	NPC	0.788	0.58	2.13083	0	0.208
HPF1	NPC	0.687	0.479	1.1194	1.1023e-209	0.208
KATNAL1	NPC	0.462	0.254	0.809649	1.52141e-254	0.208
CDKN3	NPC	0.849	0.641	1.37146	0	0.208
CDKN2AIPNL	NPC	0.664	0.457	1.37596	1.1316e-220	0.207
SIGMAR1	NPC	0.659	0.452	1.39084	6.01368e-195	0.207
ACYP1	NPC	0.535	0.328	0.395403	2.28294e-167	0.207
TRIP13	NPC	0.533	0.326	0.56261	1.99155e-114	0.207
CFAP298	NPC	0.602	0.395	0.928272	2.21978e-217	0.207
ATAD3A	NPC	0.705	0.498	0.488219	4.02243e-201	0.207
DDX56	NPC	0.6	0.393	0.859151	1.60468e-196	0.207
RRP9	NPC	0.522	0.316	0.847651	6.0302e-157	0.206
RFC3	NPC	0.544	0.338	0.527012	3.89868e-135	0.206
ZWINT	NPC	0.849	0.643	2.99585	0	0.206
RPA2	NPC	0.595	0.389	0.793597	1.08459e-167	0.206
EMB	NPC	0.281	0.076	0.785253	0	0.205
LTV1	NPC	0.567	0.362	1.09381	4.06339e-166	0.205
FERMT2	NPC	0.764	0.56	2.94689	0	0.204
GPX8	NPC	0.839	0.635	0.781043	0	0.204
GMNN	NPC	0.815	0.611	2.2049	6.82529e-284	0.204
BOP1	NPC	0.712	0.508	1.31206	8.27015e-220	0.204
HIST1H1D	NPC	0.533	0.33	6.70969	5.96928e-292	0.203
GTF2H2	NPC	0.499	0.296	1.05303	2.11854e-225	0.203
CMTM7	NPC	0.513	0.31	0.955436	3.88007e-183	0.203
CHAF1A	NPC	0.542	0.339	0.371281	1.942e-155	0.203
MNAT1	NPC	0.612	0.41	0.967933	8.53111e-211	0.202
POLR3G	NPC	0.446	0.244	0.687739	4.44602e-190	0.202
C19orf48	NPC	0.755	0.553	1.1086	8.06981e-273	0.202
RAE1	NPC	0.573	0.371	0.776849	1.43499e-138	0.202
CDK1	NPC	0.679	0.479	4.95164	2.63429e-212	0.2
SYT1	NPC	0.329	0.129	0.301464	1.63762e-262	0.2
WDR74	NPC	0.59	0.391	1.02223	4.64149e-174	0.199
CIP2A	NPC	0.576	0.377	0.308796	6.02142e-82	0.199
BRIX1	NPC	0.765	0.567	2.00298	2.47354e-283	0.198
ANAPC10	NPC	0.466	0.268	0.875562	4.64356e-193	0.198
RAD51C	NPC	0.637	0.439	0.316986	5.28733e-146	0.198
CCDC86	NPC	0.537	0.339	0.669543	2.50459e-129	0.198
SPA17	NPC	0.411	0.213	0.733282	1.05868e-176	0.198
PRPS1	NPC	0.577	0.379	0.618118	3.16801e-152	0.198
PCID2	NPC	0.57	0.372	0.555412	1.81226e-150	0.198
BCL2L12	NPC	0.672	0.475	0.630229	2.09382e-134	0.197
HSPA14-ENSG00000187522	NPC	0.445	0.248	0.64769	2.97371e-167	0.197
RPL39L	NPC	0.773	0.577	0.63355	1.80889e-208	0.196
TMEM156	NPC	0.244	0.048	2.11452	0	0.196
CD3EAP	NPC	0.618	0.422	0.526993	9.62226e-176	0.196
ARL6IP6	NPC	0.521	0.325	0.590019	2.37527e-169	0.196
MRPS14	NPC	0.602	0.406	0.43299	3.82694e-187	0.196
GMPPB	NPC	0.57	0.374	0.907514	1.98208e-167	0.196
PNO1	NPC	0.602	0.406	1.06118	1.60126e-141	0.196
SKA3	NPC	0.436	0.241	0.529106	1.05137e-145	0.195
MALL	NPC	0.423	0.228	3.95021	2.19984e-203	0.195
SDHAF3	NPC	0.564	0.369	0.634573	6.3742e-159	0.195
SF3A2	NPC	0.539	0.345	0.87678	8.98974e-149	0.194
FARSA	NPC	0.661	0.467	1.20621	2.50738e-207	0.194
MAP7D3	NPC	0.531	0.337	1.14243	5.84455e-195	0.194
BCL7B	NPC	0.522	0.328	0.495364	5.55521e-174	0.194
EXTL2	NPC	0.456	0.262	0.429799	1.0865e-166	0.194
TEDC1	NPC	0.457	0.263	0.693496	3.42693e-127	0.194
HCFC1R1	NPC	0.655	0.462	0.703241	3.15848e-213	0.193
RPF2	NPC	0.645	0.452	1.82009	3.82277e-147	0.193
SAC3D1	NPC	0.719	0.526	1.10312	1.46823e-242	0.193
MPHOSPH10	NPC	0.591	0.398	0.449653	1.9634e-154	0.193
CDCA5	NPC	0.47	0.277	0.516253	8.75148e-125	0.193
HMMR	NPC	0.723	0.53	2.96331	1.07409e-88	0.193
POLA2	NPC	0.44	0.248	0.686364	5.20233e-167	0.192
NOL4L	NPC	0.483	0.291	0.542844	1.10176e-153	0.192
BARD1	NPC	0.506	0.314	0.450335	6.10493e-149	0.192
R3HCC1	NPC	0.491	0.299	0.624244	1.34606e-137	0.192
PKMYT1	NPC	0.45	0.258	0.76171	2.1865e-122	0.192
C11orf24	NPC	0.58	0.388	0.275814	3.42599e-177	0.192
BAG2	NPC	0.647	0.456	0.953184	7.49386e-149	0.191
NUDCD2	NPC	0.748	0.557	2.36131	1.72676e-280	0.191
ABT1	NPC	0.5	0.31	0.770123	3.33797e-157	0.19
MELK	NPC	0.527	0.337	0.422533	3.1709e-91	0.19
CHAC2	NPC	0.416	0.226	0.611128	1.68854e-176	0.19
EPHB6	NPC	0.223	0.034	1.97905	0	0.189
EXOSC1	NPC	0.609	0.42	0.499673	3.76479e-154	0.189
RAD51AP1	NPC	0.484	0.295	0.407002	1.47283e-105	0.189
CHORDC1	NPC	0.741	0.552	1.52721	1.72604e-233	0.189
TOR3A	NPC	0.444	0.256	0.705927	3.14043e-187	0.188
ITGA4	NPC	0.361	0.173	1.17859	2.64994e-159	0.188
DEPDC1	NPC	0.637	0.449	0.336853	1.72076e-80	0.188
SLC25A11	NPC	0.755	0.568	1.62531	0	0.187
AATF	NPC	0.669	0.482	0.852202	1.41338e-136	0.187
GFER	NPC	0.65	0.463	1.25293	1.90991e-180	0.187
POP4	NPC	0.601	0.414	0.713508	1.44822e-143	0.187
IDH3A	NPC	0.509	0.322	0.464517	1.93955e-131	0.187
SMC2	NPC	0.813	0.626	2.06844	5.35668e-293	0.187
GLRX2	NPC	0.729	0.542	1.51394	1.53771e-291	0.187
DIMT1	NPC	0.55	0.364	0.49594	7.77149e-130	0.186
TMEM70	NPC	0.618	0.432	0.628189	2.2508e-174	0.186
FARSB	NPC	0.642	0.456	0.832075	4.45389e-160	0.186
BYSL	NPC	0.477	0.291	0.645935	1.98995e-158	0.186
PPIL1	NPC	0.518	0.332	0.793663	4.85522e-125	0.186
TEAD4	NPC	0.407	0.221	0.680768	9.68839e-182	0.186
UHRF1	NPC	0.737	0.551	0.780326	9.69109e-176	0.186
KIF2C	NPC	0.576	0.39	0.755785	1.98068e-58	0.186
NECTIN2	NPC	0.791	0.606	1.85065	0	0.185
UGDH	NPC	0.75	0.565	2.55825	4.43401e-287	0.185
EIF2B2	NPC	0.531	0.346	0.689418	1.61563e-136	0.185
ANKRD39	NPC	0.543	0.358	0.376956	2.96054e-121	0.185
NCAPG	NPC	0.676	0.491	1.13052	4.69389e-99	0.185
C1orf21	NPC	0.338	0.153	0.591141	3.5494e-212	0.185
RCC1	NPC	0.491	0.306	0.694146	1.02692e-136	0.185
ELP6	NPC	0.607	0.422	0.889022	1.47811e-136	0.185
MSH2	NPC	0.519	0.334	0.48185	4.36525e-126	0.185
WDR12	NPC	0.516	0.331	0.516879	1.67019e-120	0.185
SGO1	NPC	0.453	0.268	0.485527	2.8175e-115	0.185
MRPL35	NPC	0.701	0.516	0.725748	1.64789e-186	0.185
THYN1	NPC	0.59	0.405	0.900409	2.75411e-175	0.185
MAD2L1	NPC	0.893	0.709	1.55225	1.34817e-275	0.184
MCM3	NPC	0.792	0.608	0.479724	1.33169e-225	0.184
POLR2C	NPC	0.66	0.476	0.970597	7.63975e-177	0.184
RMDN1	NPC	0.547	0.363	0.740492	8.45998e-154	0.184
NOC4L	NPC	0.489	0.305	0.585425	6.08971e-113	0.184
RRP1	NPC	0.64	0.456	0.257006	1.90902e-110	0.184
NUP37	NPC	0.626	0.442	0.521236	2.81562e-92	0.184
SLC2A4RG	NPC	0.703	0.519	0.454871	3.70321e-184	0.184
CCDC59	NPC	0.762	0.579	0.474825	1.75043e-217	0.183
MRPS2	NPC	0.746	0.563	3.42807	1.2861e-212	0.183
PDCL3	NPC	0.628	0.445	0.846472	3.3458e-152	0.183
SCCPDH	NPC	0.62	0.437	0.532522	9.04991e-139	0.183
MRM3	NPC	0.422	0.239	0.554366	5.43799e-137	0.183
UPF3B	NPC	0.49	0.307	0.740535	2.50779e-132	0.183
CHEK1	NPC	0.609	0.426	0.729487	1.09157e-110	0.183
GRWD1	NPC	0.596	0.413	0.481115	4.69286e-107	0.183
RRP15	NPC	0.589	0.406	0.258832	1.37112e-129	0.183
ARHGAP18	NPC	0.78	0.598	2.66107	6.37853e-296	0.182
LYAR	NPC	0.795	0.613	0.968251	7.9389e-287	0.182
SEPHS1	NPC	0.676	0.494	0.974174	4.17264e-140	0.182
NUDCD1	NPC	0.559	0.377	0.581499	3.7506e-130	0.182
DTWD1	NPC	0.559	0.377	0.585269	1.26644e-118	0.182
CENPS	NPC	0.382	0.2	0.597092	6.166e-150	0.182
REEP4	NPC	0.455	0.273	0.940909	2.50393e-117	0.182
DUSP14	NPC	0.578	0.396	0.500586	5.58882e-170	0.182
RUVBL2	NPC	0.697	0.515	1.01549	6.79953e-154	0.182
MED8	NPC	0.654	0.473	1.15544	1.60648e-183	0.181
TNFAIP8	NPC	0.535	0.354	1.16914	3.75332e-146	0.181
UMPS	NPC	0.553	0.372	0.58084	2.1246e-106	0.181
CFAP36	NPC	0.511	0.33	0.916207	7.50961e-164	0.181
ELOVL6	NPC	0.499	0.318	0.560826	3.99763e-136	0.181
TACO1	NPC	0.523	0.342	0.589216	8.3493e-123	0.181
WDR5	NPC	0.512	0.331	0.457232	6.73802e-116	0.181
MCM2	NPC	0.413	0.232	0.558276	1.42379e-156	0.181
C12orf10	NPC	0.703	0.522	1.39485	3.59233e-231	0.181
MSH6	NPC	0.586	0.405	1.23981	6.6937e-154	0.181
SNRNP40	NPC	0.779	0.599	0.487866	3.98131e-239	0.18
EXOSC7	NPC	0.668	0.488	1.08523	1.78256e-150	0.18
PARPBP	NPC	0.468	0.288	0.323046	2.98844e-89	0.18
GTF2B	NPC	0.522	0.342	0.767791	9.31027e-141	0.18
TCHP	NPC	0.481	0.301	0.501779	3.83946e-132	0.18
MPHOSPH6	NPC	0.583	0.403	0.539965	3.61123e-125	0.18
HIST1H1A	NPC	0.406	0.227	4.16351	5.88185e-118	0.179
STAMBPL1	NPC	0.316	0.137	0.645924	1.04324e-238	0.179
AFAP1	NPC	0.511	0.332	0.953716	2.25582e-160	0.179
SLC19A1	NPC	0.381	0.202	0.615613	2.23634e-159	0.179
FADD	NPC	0.518	0.339	0.661758	7.77506e-146	0.179
NCAPH2	NPC	0.446	0.267	0.527327	1.02451e-125	0.179
PRPF4	NPC	0.615	0.436	0.46605	5.68801e-118	0.179
YEATS4	NPC	0.485	0.306	0.466204	4.15506e-116	0.179
CDCA7	NPC	0.492	0.313	0.335709	1.26402e-82	0.179
TMEM126A	NPC	0.712	0.533	0.794794	3.51373e-220	0.179
MAGOHB	NPC	0.796	0.618	1.32828	4.66999e-292	0.178
MLX	NPC	0.598	0.42	0.681794	2.17244e-162	0.178
UHRF2	NPC	0.43	0.252	0.459457	8.60903e-148	0.178
C1orf35	NPC	0.611	0.433	0.661398	6.29152e-140	0.178
MRPL39	NPC	0.427	0.249	0.696393	1.76843e-137	0.178
NDUFAF6	NPC	0.47	0.292	0.540546	2.19644e-132	0.178
PAK1IP1	NPC	0.634	0.456	1.3888	1.06952e-113	0.178
MTHFD1	NPC	0.601	0.423	0.343448	3.38199e-103	0.178
UCHL5	NPC	0.738	0.56	1.3395	4.10207e-217	0.178
SLC39A3	NPC	0.525	0.348	0.458081	2.34647e-115	0.177
CCNQ	NPC	0.558	0.381	0.775794	3.45105e-111	0.177
TEX30	NPC	0.681	0.504	0.26151	5.10871e-87	0.177
APOO	NPC	0.395	0.218	0.557538	6.85436e-165	0.177
FGF5	NPC	0.414	0.237	0.607956	3.13051e-150	0.177
MRPL2	NPC	0.633	0.456	0.9055	3.30658e-132	0.177
TOMM34	NPC	0.64	0.463	0.940929	1.03368e-123	0.177
PPAN	NPC	0.487	0.31	0.557992	3.17403e-121	0.177
SF3B4	NPC	0.723	0.546	1.64325	7.21738e-217	0.177
PRMT5	NPC	0.56	0.384	0.617905	1.939e-124	0.176
PRIM2	NPC	0.466	0.29	0.449676	2.64684e-114	0.176
THOP1	NPC	0.559	0.383	0.493763	2.62995e-109	0.176
FANCI	NPC	0.544	0.368	0.287252	5.63358e-80	0.176
MOSMO	NPC	0.419	0.243	0.819352	5.65913e-177	0.176
TMED1	NPC	0.585	0.409	0.766453	3.88433e-157	0.176
METTL21A	NPC	0.456	0.28	7.09036	4.01947e-146	0.176
SF3A1	NPC	0.59	0.414	0.649747	4.97451e-124	0.176
MRGBP	NPC	0.586	0.41	0.498028	1.99223e-107	0.176
SPC24	NPC	0.421	0.245	0.397473	3.98043e-103	0.176
UBE2C	NPC	0.858	0.682	12.453	1.11228e-160	0.176
PHF19	NPC	0.885	0.71	0.511453	0	0.175
PAXX	NPC	0.78	0.605	2.08352	3.98916e-292	0.175
ZMYND8	NPC	0.532	0.357	0.982875	6.30812e-167	0.175
MRPL24	NPC	0.527	0.352	0.564099	1.4184e-123	0.175
HAUS8	NPC	0.392	0.217	0.538757	1.8307e-133	0.175
RAD1	NPC	0.479	0.304	0.528046	6.5496e-135	0.175
RRS1	NPC	0.647	0.473	0.76426	1.00961e-171	0.174
HPRT1	NPC	0.682	0.508	0.564097	3.00024e-128	0.174
HMBS	NPC	0.56	0.386	0.561222	1.23164e-108	0.174
SLC1A1	NPC	0.266	0.092	0.733465	7.04632e-292	0.174
PPP1R35	NPC	0.629	0.455	0.664849	1.50395e-166	0.174
TEX264	NPC	0.6	0.426	0.801842	6.15365e-157	0.174
PPIL3	NPC	0.412	0.238	0.588409	4.00342e-148	0.174
NXT1	NPC	0.639	0.465	0.478914	3.9805e-147	0.174
NAT14	NPC	0.498	0.324	0.892868	1.11968e-143	0.174
TIMM9	NPC	0.631	0.457	0.527708	2.27568e-128	0.174
ILKAP	NPC	0.621	0.447	0.625678	1.59516e-116	0.174
PPP5C	NPC	0.581	0.407	0.431293	6.26888e-115	0.174
KIFC1	NPC	0.473	0.299	0.534438	9.26761e-76	0.174
POLR3H	NPC	0.546	0.373	0.314858	3.65564e-129	0.173
THOC6	NPC	0.401	0.228	0.78506	1.35342e-125	0.173
FRMD3	NPC	0.253	0.08	1.01732	1.83819e-276	0.173
FANCA	NPC	0.43	0.257	0.470533	1.88062e-121	0.173
POC1A	NPC	0.451	0.278	0.268997	1.79306e-70	0.173
SDHB	NPC	0.644	0.472	0.58092	6.75826e-149	0.172
PELP1	NPC	0.526	0.354	0.613714	7.66051e-97	0.172
DONSON	NPC	0.399	0.227	0.470175	3.50279e-131	0.172
TCF21	NPC	0.186	0.014	9.77	0	0.172
PYCR2	NPC	0.423	0.251	0.496954	7.02097e-142	0.172
TBRG4	NPC	0.623	0.451	1.54041	1.39528e-127	0.172
ZNF703	NPC	0.41	0.238	0.45858	2.96087e-127	0.172
MGME1	NPC	0.474	0.302	0.55596	1.22703e-119	0.172
ATAD3B	NPC	0.584	0.412	0.326368	3.6057e-74	0.172
POLR3K	NPC	0.854	0.682	3.38436	0	0.172
RNASEH2B	NPC	0.573	0.401	0.822559	4.19437e-109	0.172
FKBP4	NPC	0.81	0.639	2.17209	0	0.171
CMC2	NPC	0.768	0.597	0.682943	1.75207e-236	0.171
EXOSC4	NPC	0.657	0.486	1.24864	6.35465e-158	0.171
NDUFAF4	NPC	0.645	0.474	0.742536	2.13234e-129	0.171
PTGER1	NPC	0.233	0.062	1.90382	4.23657e-292	0.171
TOE1	NPC	0.353	0.182	0.561477	1.41663e-159	0.171
CITED2	NPC	0.6	0.429	5.25581	9.42187e-157	0.171
ACD	NPC	0.431	0.26	0.472352	1.08955e-132	0.171
ALDH7A1	NPC	0.578	0.407	0.750313	1.11758e-116	0.171
DBF4	NPC	0.612	0.441	1.29291	1.50438e-102	0.171
ECI2	NPC	0.917	0.747	3.75039	0	0.17
PIGP	NPC	0.468	0.298	0.547663	1.19308e-129	0.17
YARS2	NPC	0.46	0.29	0.574668	1.14914e-124	0.17
SRPRA	NPC	0.538	0.368	0.540937	2.19308e-121	0.17
SURF2	NPC	0.632	0.462	0.704516	1.60005e-144	0.17
ANKRD26	NPC	0.446	0.276	0.67952	2.61564e-143	0.17
POLR3D	NPC	0.501	0.331	0.527128	2.66457e-141	0.17
CERS2	NPC	0.497	0.327	0.610758	1.04327e-129	0.17
HCCS	NPC	0.583	0.413	0.67453	2.62956e-117	0.17
COA6	NPC	0.723	0.553	2.02299	2.67795e-173	0.17
PSMG4	NPC	0.708	0.538	1.46302	1.71419e-131	0.17
PHF5A	NPC	0.574	0.404	0.567131	2.10775e-86	0.17
NUDT2	NPC	0.523	0.354	0.680692	4.71422e-132	0.169
SMPD4	NPC	0.538	0.369	0.391447	5.48062e-92	0.169
HYLS1	NPC	0.392	0.223	0.697099	2.11366e-125	0.169
TMEM98	NPC	0.617	0.448	0.829421	1.01292e-138	0.169
FAM104A	NPC	0.585	0.416	0.607511	6.69558e-130	0.169
GALE	NPC	0.613	0.444	0.757727	6.76651e-127	0.169
NOM1	NPC	0.447	0.278	0.598579	1.23547e-126	0.169
TAF12	NPC	0.594	0.425	0.266173	4.78847e-126	0.169
MLST8	NPC	0.499	0.33	0.369066	2.23848e-109	0.169
METTL23	NPC	0.496	0.327	0.56441	1.26148e-105	0.169
PINX1	NPC	0.445	0.276	0.504153	1.98577e-103	0.169
PARP2	NPC	0.434	0.265	0.427217	2.5309e-101	0.169
RNF126	NPC	0.775	0.607	1.33825	4.34038e-265	0.168
LACTB	NPC	0.557	0.389	2.31194	8.87437e-176	0.168
TGM2	NPC	0.752	0.584	24.0251	2.06451e-149	0.168
EMD	NPC	0.681	0.513	0.384033	2.06569e-131	0.168
HMGXB4	NPC	0.646	0.478	0.623391	1.11363e-127	0.168
COPS4	NPC	0.55	0.382	0.445642	4.75544e-103	0.168
CENPA	NPC	0.513	0.345	0.4633	1.23075e-55	0.168
RFT1	NPC	0.4	0.232	0.591752	4.44926e-134	0.168
RAD18	NPC	0.421	0.253	0.494887	8.66379e-131	0.168
SYDE1	NPC	0.441	0.273	0.409261	8.32178e-124	0.168
NSMCE1	NPC	0.592	0.424	0.586833	3.60445e-110	0.168
RFC5	NPC	0.428	0.26	0.427817	4.63815e-94	0.168
LIG1	NPC	0.449	0.281	0.363152	7.71621e-93	0.168
SMC6	NPC	0.568	0.4	0.606745	5.12288e-119	0.168
INTS11	NPC	0.564	0.396	0.576931	7.7104e-105	0.168
DNAJC9	NPC	0.861	0.694	1.90782	0	0.167
COPS5	NPC	0.682	0.515	1.05964	3.50733e-190	0.167
PSMG3	NPC	0.737	0.57	0.792365	3.29201e-172	0.167
ZNF511	NPC	0.732	0.565	0.470641	7.62238e-123	0.167
C15orf61	NPC	0.464	0.297	0.388896	1.59004e-121	0.167
TP53RK	NPC	0.515	0.348	0.743366	7.01789e-121	0.167
MORN2	NPC	0.544	0.377	0.341925	1.31498e-86	0.167
C12orf45	NPC	0.559	0.392	0.338876	1.39334e-84	0.167
DCTD	NPC	0.588	0.421	0.639927	1.74173e-134	0.167
CIAPIN1	NPC	0.627	0.46	0.823226	4.97351e-125	0.167
PSMC2	NPC	0.702	0.535	0.890955	6.4636e-203	0.167
MAP2K3	NPC	0.563	0.396	0.360772	1.78729e-156	0.167
FAM114A1	NPC	0.698	0.531	0.397063	2.14075e-145	0.167
IFRD2	NPC	0.742	0.576	1.11478	7.57877e-178	0.166
SRPRB	NPC	0.643	0.477	1.28773	9.09729e-160	0.166
TOR1A	NPC	0.648	0.482	0.849197	5.16532e-150	0.166
POLD3	NPC	0.454	0.288	0.536867	4.68003e-117	0.166
BCCIP	NPC	0.634	0.468	0.742794	4.50883e-114	0.166
NOC3L	NPC	0.624	0.458	0.265261	2.77984e-109	0.166
CZIB	NPC	0.582	0.416	0.567054	2.06889e-101	0.166
TRMT6	NPC	0.501	0.335	0.466191	7.0995e-100	0.166
ZNHIT3	NPC	0.571	0.405	0.715625	5.9772e-116	0.166
CEP170	NPC	0.863	0.698	0.687706	0	0.165
PBDC1	NPC	0.651	0.486	1.25435	8.58383e-140	0.165
POLR1C	NPC	0.406	0.241	0.614889	1.05959e-129	0.165
POLR1E	NPC	0.463	0.298	0.467521	1.09338e-111	0.165
MRPS9	NPC	0.557	0.392	0.621636	4.88594e-96	0.165
PPAT	NPC	0.511	0.346	0.408702	2.05611e-93	0.165
KIF23	NPC	0.663	0.498	1.10054	1.73107e-80	0.165
DSN1	NPC	0.385	0.22	0.523456	3.54065e-155	0.165
EPHA2	NPC	0.503	0.338	0.781976	1.94909e-159	0.165
TAF9B	NPC	0.358	0.193	0.592425	7.511e-140	0.165
DSCC1	NPC	0.365	0.2	0.411605	2.78767e-135	0.165
NOB1	NPC	0.599	0.434	0.695701	2.55165e-119	0.165
TRMT10C	NPC	0.58	0.415	0.535106	2.47044e-91	0.165
COPS3	NPC	0.781	0.617	1.3948	1.42913e-241	0.164
PITHD1	NPC	0.671	0.507	2.1333	3.01698e-156	0.164
POLE3	NPC	0.784	0.62	1.12891	4.75655e-141	0.164
NDN	NPC	0.517	0.353	0.467669	2.04174e-107	0.164
UTP6	NPC	0.524	0.36	0.717701	1.26631e-105	0.164
TMEM11	NPC	0.615	0.451	0.764687	1.43847e-115	0.164
MRPL49	NPC	0.441	0.277	0.474835	3.30007e-115	0.164
SPATA33	NPC	0.471	0.307	0.34424	1.63467e-104	0.164
PMPCA	NPC	0.648	0.485	0.665482	3.7216e-111	0.163
MRPS22	NPC	0.512	0.349	0.501292	1.06165e-83	0.163
WDR54	NPC	0.581	0.418	0.744223	5.83516e-107	0.163
RNASEH1	NPC	0.62	0.457	0.456855	6.4595e-95	0.163
RPA1	NPC	0.593	0.43	0.566483	7.07581e-95	0.163
CHAMP1	NPC	0.5	0.337	0.41309	3.83332e-93	0.163
CEP78	NPC	0.5	0.337	0.326865	9.58964e-86	0.163
DCXR	NPC	0.675	0.513	0.567896	2.67896e-117	0.162
AAMP	NPC	0.54	0.378	0.81728	7.80285e-103	0.162
MCMBP	NPC	0.468	0.306	0.279901	5.10693e-97	0.162
SEC22C	NPC	0.531	0.369	0.510391	8.32099e-97	0.162
ABCF2	NPC	0.538	0.376	0.79683	4.36029e-87	0.162
ESAM	NPC	0.177	0.015	3.2391	0	0.162
GEMIN7	NPC	0.497	0.335	0.253852	1.21979e-109	0.162
ATIC	NPC	0.682	0.521	0.833083	5.48833e-148	0.161
ELOF1	NPC	0.632	0.471	1.1635	8.75095e-112	0.161
C12orf29	NPC	0.446	0.285	0.425708	1.23732e-108	0.161
EEF1AKMT2	NPC	0.448	0.287	0.428036	1.2064e-84	0.161
FGF1	NPC	0.318	0.157	0.543679	5.08118e-144	0.161
WDR76	NPC	0.389	0.228	0.578685	6.95288e-117	0.161
MRPL44	NPC	0.572	0.411	0.540749	5.2605e-90	0.161
PCNA	NPC	0.86	0.7	1.53427	0	0.16
TMX2	NPC	0.673	0.513	0.894349	5.16666e-157	0.16
PRELID3B	NPC	0.678	0.518	0.809533	4.44376e-151	0.16
CTU2	NPC	0.341	0.181	0.498912	3.14567e-136	0.16
SPOP	NPC	0.538	0.378	0.530456	1.56317e-103	0.16
DRG1	NPC	0.536	0.376	0.536534	8.5173e-94	0.16
NPM3	NPC	0.683	0.523	0.517389	1.66772e-92	0.16
PLRG1	NPC	0.562	0.402	0.603892	5.12304e-92	0.16
SRP68	NPC	0.523	0.363	0.424738	2.29169e-89	0.16
EIF2B1	NPC	0.508	0.348	0.252751	5.37882e-78	0.16
ANLN	NPC	0.811	0.651	0.463038	5.79622e-65	0.16
CDCA8	NPC	0.516	0.356	0.761983	1.22668e-40	0.16
P3H3	NPC	0.367	0.207	0.322377	1.5195e-134	0.16
FUCA2	NPC	0.626	0.466	0.598483	8.83623e-124	0.16
EEF1AKMT1	NPC	0.41	0.25	0.517914	2.38253e-113	0.16
DUSP12	NPC	0.476	0.316	0.475938	1.5593e-85	0.16
TIMM50	NPC	0.702	0.542	0.443927	3.5869e-129	0.16
CENPE	NPC	0.564	0.404	0.801693	1.93148e-60	0.16
DDRGK1	NPC	0.633	0.474	0.878559	3.08378e-125	0.159
NT5C3A	NPC	0.452	0.293	0.425685	2.40653e-110	0.159
BCS1L	NPC	0.41	0.251	0.523197	6.15231e-110	0.159
CEP290	NPC	0.476	0.317	0.461221	1.9987e-109	0.159
FN3KRP	NPC	0.415	0.256	0.581835	4.19402e-103	0.159
METTL1	NPC	0.408	0.249	0.36482	2.65623e-96	0.159
TIMM23	NPC	0.496	0.337	0.413153	2.66706e-94	0.159
PEF1	NPC	0.588	0.429	0.331178	1.82666e-77	0.159
EMG1	NPC	0.784	0.626	1.75979	1.37431e-207	0.158
APIP	NPC	0.472	0.314	0.525505	2.103e-96	0.158
TSR2	NPC	0.501	0.343	0.49716	1.14413e-80	0.158
MRPL58	NPC	0.72	0.562	1.43879	2.857e-157	0.158
RWDD4	NPC	0.661	0.504	0.767829	1.004e-133	0.157
GAR1	NPC	0.651	0.494	0.513745	1.49268e-82	0.157
NUDT15	NPC	0.521	0.364	0.328466	7.4546e-61	0.157
ISOC1	NPC	0.371	0.214	0.485904	5.06634e-131	0.157
TXNDC15	NPC	0.423	0.266	0.395089	1.31028e-113	0.157
ICMT	NPC	0.585	0.428	0.489515	5.98047e-103	0.157
ATAD5	NPC	0.417	0.26	0.414084	3.86139e-100	0.157
IFT22	NPC	0.642	0.486	0.804266	3.46778e-94	0.156
ZNF330	NPC	0.51	0.354	0.467061	2.4568e-90	0.156
BRCA2	NPC	0.451	0.295	0.35322	1.3407e-73	0.156
FKBP7	NPC	0.353	0.197	0.358514	1.41154e-122	0.156
PREB	NPC	0.435	0.279	0.420944	3.18516e-107	0.156
RITA1	NPC	0.413	0.257	0.374692	6.51897e-106	0.156
CERK	NPC	0.425	0.269	0.367968	6.41349e-105	0.156
MPDU1	NPC	0.608	0.452	0.769683	6.51714e-103	0.156
SGTA	NPC	0.617	0.461	0.36363	1.37948e-81	0.156
YDJC	NPC	0.599	0.443	0.559666	4.14234e-76	0.156
SSBP4	NPC	0.718	0.562	0.587662	3.08881e-142	0.156
NIP7	NPC	0.755	0.6	1.1831	1.38498e-184	0.155
RBM42	NPC	0.685	0.53	1.01247	8.74966e-123	0.155
AMZ2	NPC	0.44	0.285	0.688341	2.07461e-113	0.155
NKAP	NPC	0.524	0.369	0.427784	6.27952e-92	0.155
PPIE	NPC	0.554	0.399	0.503056	3.39249e-87	0.155
SCML1	NPC	0.306	0.151	0.428943	2.83161e-139	0.155
DNAJC1	NPC	0.568	0.413	0.43621	1.30096e-121	0.155
TRABD	NPC	0.603	0.448	0.553261	6.05727e-101	0.155
RBFA	NPC	0.588	0.433	0.589716	1.46237e-91	0.155
IMMP1L	NPC	0.478	0.323	0.362496	9.15211e-73	0.155
HMGB2	NPC	0.917	0.763	12.4095	6.40197e-297	0.154
TM2D2	NPC	0.654	0.5	0.591084	2.5803e-147	0.154
CD2BP2	NPC	0.655	0.501	0.723755	1.5549e-142	0.154
COMMD1	NPC	0.663	0.509	0.633261	1.79143e-105	0.154
ZFAND1	NPC	0.459	0.305	0.527693	6.47445e-91	0.154
MRPL1	NPC	0.665	0.511	0.42224	4.781e-73	0.154
CTU1	NPC	0.435	0.281	0.644737	2.20769e-99	0.154
PUSL1	NPC	0.47	0.316	0.316843	2.512e-92	0.154
AK2	NPC	0.716	0.562	0.802129	4.37734e-141	0.154
RPA3	NPC	0.886	0.733	0.731382	3.35734e-292	0.153
BCAS2	NPC	0.734	0.581	1.21513	1.58967e-177	0.153
GMPS	NPC	0.727	0.574	1.09985	1.12207e-172	0.153
TFAM	NPC	0.77	0.617	0.456723	4.05843e-124	0.153
DIAPH3	NPC	0.78	0.627	0.509301	3.83027e-121	0.153
PRIM1	NPC	0.336	0.183	0.314292	1.94332e-115	0.153
DNAJA3	NPC	0.44	0.287	0.425918	1.65603e-108	0.153
FRG1	NPC	0.532	0.379	0.630004	1.04908e-92	0.153
ISY1	NPC	0.439	0.286	0.498817	2.19315e-89	0.153
FTSJ3	NPC	0.527	0.374	0.375748	8.41016e-78	0.153
POGLUT3	NPC	0.382	0.229	0.444021	2.76212e-119	0.153
C17orf75	NPC	0.38	0.227	0.414116	2.75587e-99	0.153
SPAG5	NPC	0.361	0.208	0.398196	3.5025e-62	0.153
SPRYD7	NPC	0.488	0.335	0.31504	5.8964e-95	0.153
NOL10	NPC	0.476	0.323	0.457325	2.5315e-87	0.153
TIMM22	NPC	0.616	0.463	0.266358	4.50947e-79	0.153
AK6	NPC	0.71	0.557	1.36667	2.19774e-181	0.153
ZDHHC12	NPC	0.689	0.536	0.294026	1.35257e-140	0.153
ZNRD2	NPC	0.795	0.643	1.53073	5.32599e-258	0.152
EMC8	NPC	0.745	0.593	0.600373	2.91579e-156	0.152
L3HYPDH	NPC	0.388	0.236	0.546002	1.55037e-121	0.152
ISCA2	NPC	0.649	0.497	0.726081	8.45117e-100	0.152
CDK5RAP2	NPC	0.517	0.365	12.7129	1.40188e-98	0.152
ZMYND19	NPC	0.447	0.295	0.364961	2.56377e-92	0.152
PIGX	NPC	0.458	0.306	0.424192	7.0143e-90	0.152
SUCLA2	NPC	0.538	0.386	0.31331	1.70043e-86	0.152
RPUSD3	NPC	0.499	0.347	0.482117	1.91567e-83	0.152
NUP88	NPC	0.456	0.304	0.394382	5.54248e-82	0.152
CCDC43	NPC	0.5	0.348	0.325899	1.67452e-81	0.152
CDCA7L	NPC	0.417	0.265	0.392975	5.58033e-105	0.152
PIGF	NPC	0.481	0.329	0.496606	4.7528e-98	0.152
FAF2	NPC	0.594	0.442	0.496128	2.34728e-93	0.152
PRPF19	NPC	0.477	0.325	0.396691	8.81896e-72	0.152
HJURP	NPC	0.475	0.323	2.6106	6.62765e-30	0.152
ALG5	NPC	0.64	0.489	0.343125	5.98326e-128	0.151
SNAP47	NPC	0.387	0.236	0.441631	1.59633e-100	0.151
MED31	NPC	0.672	0.521	0.635113	2.54869e-94	0.151
DDB2	NPC	0.446	0.295	0.668514	2.65853e-94	0.151
C16orf91	NPC	0.458	0.307	0.602529	1.74275e-91	0.151
AVEN	NPC	0.537	0.386	0.771776	1.83718e-81	0.151
GTPBP8	NPC	0.457	0.306	0.393963	1.09095e-73	0.151
TLR4	NPC	0.249	0.098	0.270561	4.00573e-166	0.151
B9D1	NPC	0.322	0.171	0.532265	2.21686e-148	0.151
NSMCE3	NPC	0.432	0.281	0.550275	1.87931e-113	0.151
NUDT9	NPC	0.428	0.277	0.620614	6.07453e-109	0.151
FXN	NPC	0.423	0.272	0.434011	1.95746e-96	0.151
BET1	NPC	0.487	0.336	0.548466	9.37343e-91	0.151
PDRG1	NPC	0.469	0.318	0.480342	1.76577e-72	0.151
SRRT	NPC	0.703	0.552	1.35564	3.80205e-119	0.151
TBPL1	NPC	0.558	0.408	0.337829	1.10468e-76	0.15
CYB5B	NPC	0.717	0.567	0.899855	2.81383e-140	0.15
WDR46	NPC	0.623	0.473	0.485016	4.85213e-97	0.15
FRA10AC1	NPC	0.437	0.287	0.424985	1.69217e-90	0.15
PRKRIP1	NPC	0.459	0.309	0.351242	3.02145e-77	0.15
CWC27	NPC	0.549	0.399	0.505365	1.00118e-68	0.15
SAAL1	NPC	0.384	0.234	0.445396	2.93859e-92	0.15
NIF3L1	NPC	0.376	0.226	0.438122	7.22935e-86	0.15
PLPP2	NPC	0.417	0.267	1.31865	1.90498e-116	0.15
MPP4	NPC	0.202	0.053	0.588609	3.37952e-277	0.149
ZNF580	NPC	0.661	0.512	3.3674	3.49086e-117	0.149
UNC50	NPC	0.44	0.291	0.599815	1.81787e-108	0.149
C1GALT1	NPC	0.505	0.356	0.500228	5.40797e-103	0.149
BOD1	NPC	0.637	0.488	0.573998	1.51977e-91	0.149
LRWD1	NPC	0.385	0.236	0.348748	5.88671e-86	0.149
DDX49	NPC	0.535	0.386	0.38965	2.99877e-81	0.149
NUP188	NPC	0.449	0.3	0.309353	1.81307e-79	0.149
MYBBP1A	NPC	0.46	0.311	0.267942	1.32931e-75	0.149
APTX	NPC	0.517	0.368	0.441334	6.49559e-73	0.149
WDR77	NPC	0.514	0.365	0.410643	4.71369e-69	0.149
PNPT1	NPC	0.533	0.384	0.379706	3.62855e-66	0.149
MRPL48	NPC	0.524	0.375	0.435913	3.26772e-60	0.149
LETM2	NPC	0.32	0.171	0.445361	2.20333e-144	0.149
ATG4D	NPC	0.344	0.195	0.389466	7.14626e-114	0.149
NR2F2	NPC	0.888	0.74	15.0969	0	0.148
MTHFD2	NPC	0.729	0.581	2.67802	5.70041e-138	0.148
HIST1H1E	NPC	0.449	0.301	0.882391	6.20879e-137	0.148
JAGN1	NPC	0.67	0.522	0.902728	2.60344e-106	0.148
RIOK2	NPC	0.405	0.257	0.344091	2.63347e-86	0.148
OSGEP	NPC	0.441	0.293	0.482098	5.57581e-85	0.148
VPS4A	NPC	0.623	0.475	0.32895	6.30459e-73	0.148
AIMP2	NPC	0.516	0.368	0.316857	1.60342e-55	0.148
RPF1	NPC	0.533	0.385	0.476281	8.24625e-51	0.148
EID2	NPC	0.373	0.225	0.52313	3.27207e-112	0.148
SLC25A10	NPC	0.36	0.212	0.350195	8.13176e-89	0.148
PKNOX1	NPC	0.417	0.269	0.355064	5.52391e-96	0.148
JMJD6	NPC	0.411	0.263	0.371035	1.95537e-94	0.148
LUC7L	NPC	0.596	0.448	0.257316	4.06396e-73	0.148
COQ9	NPC	0.483	0.335	0.337492	2.1048e-70	0.148
EXOSC6	NPC	0.6	0.452	0.262886	1.71855e-61	0.148
NOP58	NPC	0.757	0.61	1.16284	4.05667e-138	0.147
SAR1B	NPC	0.682	0.535	0.823906	5.33217e-122	0.147
DDX55	NPC	0.397	0.25	0.451834	2.38475e-97	0.147
TMEM242	NPC	0.439	0.292	0.491223	3.36466e-96	0.147
AASDHPPT	NPC	0.63	0.483	0.662485	4.09208e-94	0.147
COQ5	NPC	0.389	0.242	0.405677	8.49471e-85	0.147
GNL1	NPC	0.51	0.363	0.360792	6.17884e-83	0.147
KIF1BP	NPC	0.518	0.371	0.392896	8.03866e-82	0.147
USE1	NPC	0.439	0.292	0.401057	1.9505e-81	0.147
RGS20	NPC	0.466	0.319	0.310638	3.83031e-65	0.147
RCC1L	NPC	0.502	0.355	0.353181	2.70331e-63	0.147
PDCD7	NPC	0.549	0.402	0.355546	5.82991e-62	0.147
CNTLN	NPC	0.37	0.223	0.531871	9.68739e-107	0.147
AKIP1	NPC	0.481	0.334	0.414738	2.67218e-89	0.147
C12orf43	NPC	0.476	0.329	0.432183	5.07047e-60	0.147
RRP7A	NPC	0.826	0.679	1.36477	1.67924e-278	0.147
TIMM17B	NPC	0.691	0.544	0.948598	9.35201e-129	0.147
GOSR1	NPC	0.562	0.416	0.553203	1.59981e-90	0.146
LRRFIP2	NPC	0.727	0.581	0.688949	1.01597e-176	0.146
MOCS2	NPC	0.744	0.598	1.26443	1.25457e-158	0.146
DESI1	NPC	0.642	0.496	0.543691	7.28399e-132	0.146
ACBD6	NPC	0.663	0.517	0.607842	8.1281e-109	0.146
DYRK4	NPC	0.382	0.236	0.41999	2.38731e-108	0.146
PRPSAP2	NPC	0.397	0.251	0.339318	6.46599e-103	0.146
CPNE1	NPC	0.668	0.522	0.2808	2.12638e-97	0.146
MAPK12	NPC	0.401	0.255	0.252578	2.03739e-87	0.146
PITRM1	NPC	0.532	0.386	0.551528	7.68835e-77	0.146
TOPBP1	NPC	0.519	0.373	0.315957	2.40075e-65	0.146
NGDN	NPC	0.37	0.224	0.371608	8.40633e-86	0.146
SCO2	NPC	0.606	0.46	0.682901	4.98672e-118	0.146
GTF2E2	NPC	0.58	0.434	0.418187	2.54142e-78	0.146
TMEM115	NPC	0.481	0.335	0.553177	5.50661e-78	0.146
TRUB2	NPC	0.48	0.334	0.371274	1.99287e-77	0.146
SAFB2	NPC	0.567	0.421	0.546231	7.93326e-77	0.146
DGCR6L	NPC	0.569	0.423	0.331969	4.87764e-73	0.146
KNOP1	NPC	0.613	0.467	0.398404	1.65992e-62	0.146
UTP18	NPC	0.69	0.544	0.351904	1.23242e-77	0.146
EBPL	NPC	0.779	0.634	2.15283	1.99571e-225	0.145
TMEM126B	NPC	0.684	0.539	0.649838	1.41521e-111	0.145
P3H1	NPC	0.402	0.257	0.380513	3.93366e-109	0.145
MAIP1	NPC	0.389	0.244	0.506364	8.01338e-93	0.145
FTSJ1	NPC	0.447	0.302	0.473952	6.61276e-88	0.145
RIOK1	NPC	0.433	0.288	0.387161	2.78536e-82	0.145
MOB4	NPC	0.625	0.48	0.402356	6.72015e-74	0.145
ELAC2	NPC	0.504	0.359	0.310911	4.59402e-72	0.145
PTRH2	NPC	0.5	0.355	0.314205	2.79839e-71	0.145
NUP107	NPC	0.452	0.307	0.253588	1.25853e-69	0.145
TTF1	NPC	0.496	0.351	0.380513	2.43378e-62	0.145
FAM111B	NPC	0.36	0.215	1.10364	5.25125e-125	0.145
LIAS	NPC	0.368	0.223	0.426086	5.74897e-88	0.145
SKP2	NPC	0.344	0.199	0.251691	3.07028e-101	0.145
MED27	NPC	0.409	0.264	0.386023	2.91444e-91	0.145
C15orf40	NPC	0.586	0.441	0.563868	2.04117e-85	0.145
COQ2	NPC	0.423	0.278	0.44604	3.14166e-70	0.145
ESF1	NPC	0.611	0.466	0.337411	1.83541e-67	0.145
SP100	NPC	0.579	0.434	0.502567	9.21066e-66	0.145
TYMS	NPC	0.945	0.8	1.64797	0	0.145
MCRS1	NPC	0.557	0.413	0.323415	1.62745e-69	0.144
SF3A3	NPC	0.795	0.651	1.57434	3.96062e-194	0.144
DEGS1	NPC	0.67	0.526	1.11058	1.70365e-139	0.144
UCHL3	NPC	0.753	0.609	0.983561	2.2903e-128	0.144
MAGEF1	NPC	0.467	0.323	0.473427	8.46851e-86	0.144
PACSIN3	NPC	0.429	0.285	0.336613	2.76621e-78	0.144
MAK16	NPC	0.458	0.314	0.366861	3.96745e-77	0.144
YIF1B	NPC	0.526	0.382	0.410424	8.00338e-77	0.144
ERAL1	NPC	0.448	0.304	0.405486	3.13775e-73	0.144
KEAP1	NPC	0.441	0.297	0.267891	6.29237e-70	0.144
PFDN6	NPC	0.613	0.469	0.416818	7.88203e-66	0.144
SNRNP35	NPC	0.443	0.299	0.30876	5.56579e-63	0.144
AURKA	NPC	0.667	0.523	0.761388	5.74753e-57	0.144
TPX2	NPC	0.865	0.721	3.46253	5.81027e-32	0.144
BLM	NPC	0.374	0.23	0.553538	2.17178e-83	0.144
ATXN2L	NPC	0.423	0.279	0.366892	6.37668e-86	0.144
RAD51	NPC	0.344	0.2	0.32467	4.10709e-78	0.144
COMMD3	NPC	0.605	0.461	0.295427	3.79106e-74	0.144
SCO1	NPC	0.554	0.411	0.375536	8.45831e-71	0.143
PCLAF	NPC	0.973	0.83	2.8648	0	0.143
SCN9A	NPC	0.171	0.028	0.595728	0	0.143
FAM200B	NPC	0.761	0.618	0.423373	1.91551e-179	0.143
MRPS25	NPC	0.726	0.583	0.578722	1.26537e-124	0.143
DNAJC2	NPC	0.718	0.575	0.805258	1.34301e-123	0.143
DHX16	NPC	0.386	0.243	0.429665	8.85797e-93	0.143
NT5DC1	NPC	0.388	0.245	0.433181	8.67937e-92	0.143
GTF2H3	NPC	0.54	0.397	0.552331	2.75289e-69	0.143
JMJD8	NPC	0.525	0.382	0.330681	2.46533e-67	0.143
NDUFAF5	NPC	0.373	0.23	0.447712	6.8066e-93	0.143
THAP11	NPC	0.375	0.232	0.363556	1.12289e-81	0.143
MRPS30	NPC	0.479	0.336	0.48059	2.69726e-53	0.143
CTSC	NPC	0.94	0.797	22.3059	0	0.143
SS18L2	NPC	0.696	0.553	0.509369	3.04015e-106	0.143
SMIM10	NPC	0.253	0.111	0.480504	7.3035e-163	0.142
PPIL4	NPC	0.531	0.389	0.672216	2.28329e-95	0.142
GPS1	NPC	0.667	0.525	1.42796	9.39042e-94	0.142
THG1L	NPC	0.381	0.239	0.377634	1.03531e-78	0.142
GNL2	NPC	0.499	0.357	0.454565	3.66869e-72	0.142
SLF1	NPC	0.312	0.17	0.390768	3.20884e-114	0.142
SAMM50	NPC	0.591	0.449	0.570232	3.90284e-88	0.142
COPS7A	NPC	0.481	0.339	0.432196	1.1662e-78	0.142
LMF2	NPC	0.555	0.414	0.482741	5.55972e-67	0.141
MRPL22	NPC	0.837	0.696	2.00257	0	0.141
TUSC3	NPC	0.77	0.629	1.9476	2.67523e-273	0.141
POP5	NPC	0.731	0.59	2.59344	1.84647e-163	0.141
TSSC4	NPC	0.659	0.518	1.6508	3.1332e-108	0.141
MYO19	NPC	0.401	0.26	0.381475	1.16235e-89	0.141
SIKE1	NPC	0.511	0.37	0.298914	6.6633e-79	0.141
DNAJB12	NPC	0.446	0.305	0.375174	4.44634e-74	0.141
TIMM44	NPC	0.439	0.298	0.36584	2.14043e-70	0.141
GLOD4	NPC	0.661	0.52	0.419266	1.12645e-67	0.141
CEP57	NPC	0.506	0.365	0.301645	1.72186e-60	0.141
RNF141	NPC	0.417	0.276	0.968887	6.16743e-115	0.141
COMMD2	NPC	0.606	0.465	0.593106	5.50928e-78	0.141
CHMP6	NPC	0.416	0.275	0.53232	2.45498e-71	0.141
DFFA	NPC	0.69	0.549	0.958812	1.39135e-135	0.141
AHSA1	NPC	0.8	0.66	1.1656	3.7678e-266	0.14
PSMF1	NPC	0.623	0.483	0.398895	1.1153e-91	0.14
STIM2	NPC	0.397	0.257	0.281254	1.64728e-87	0.14
TAF3	NPC	0.39	0.25	0.434612	1.24188e-86	0.14
DPM2	NPC	0.709	0.569	0.691059	1.21006e-83	0.14
TOR4A	NPC	0.398	0.258	0.273781	8.84836e-74	0.14
PQBP1	NPC	0.629	0.489	0.500036	1.48927e-73	0.14
NFU1	NPC	0.495	0.355	0.477761	5.12418e-71	0.14
ALDH9A1	NPC	0.54	0.4	0.310899	1.34187e-62	0.14
ALDH3A2	NPC	0.359	0.219	0.342241	2.21259e-85	0.14
UROD	NPC	0.601	0.461	0.52629	2.78446e-73	0.14
PMVK	NPC	0.571	0.431	0.422498	1.04787e-64	0.14
MRPL21	NPC	0.818	0.678	1.24886	7.4833e-215	0.14
GYPC	NPC	0.888	0.749	3.07975	0	0.139
DNAJC30	NPC	0.387	0.248	0.450064	5.07275e-93	0.139
PPCS	NPC	0.485	0.346	0.404708	2.68832e-75	0.139
FASTK	NPC	0.515	0.376	0.274931	1.13275e-68	0.139
TMEM138	NPC	0.422	0.283	0.36068	2.27961e-68	0.139
USP39	NPC	0.45	0.311	0.406698	9.72154e-68	0.139
MTIF2	NPC	0.486	0.347	0.269567	1.47515e-52	0.139
GPN1	NPC	0.496	0.357	1.78102	3.43029e-44	0.139
GEMIN2	NPC	0.31	0.171	0.450318	1.36307e-112	0.139
TMEM101	NPC	0.344	0.205	0.416006	1.47721e-102	0.139
TRMT11	NPC	0.372	0.233	0.370119	1.34242e-91	0.139
CPSF4	NPC	0.372	0.233	0.281743	6.28304e-81	0.139
ILVBL	NPC	0.42	0.281	0.427341	1.74033e-65	0.139
NME6	NPC	0.471	0.332	0.445803	1.63256e-62	0.139
OXA1L	NPC	0.546	0.408	0.376784	1.00715e-74	0.138
CSTF2	NPC	0.313	0.175	0.423634	1.81228e-109	0.138
EIF1AD	NPC	0.334	0.196	0.372765	1.02028e-103	0.138
RDH14	NPC	0.443	0.305	0.441959	7.25414e-91	0.138
CEP63	NPC	0.4	0.262	0.398791	1.37018e-89	0.138
ZNF22	NPC	0.666	0.528	0.547888	1.56404e-86	0.138
LENG1	NPC	0.335	0.197	0.30708	1.63651e-80	0.138
DHRS4L2	NPC	0.448	0.31	0.315685	3.87469e-78	0.138
B4GALT7	NPC	0.448	0.31	0.394648	2.30562e-71	0.138
UBA5	NPC	0.463	0.325	0.375955	3.57867e-71	0.138
LUC7L2	NPC	0.532	0.394	0.688236	9.41754e-68	0.138
PGM2	NPC	0.439	0.301	0.323378	4.14779e-67	0.138
SNAPIN	NPC	0.497	0.359	0.363652	2.87402e-61	0.138
COASY	NPC	0.435	0.297	0.287204	2.67278e-60	0.138
PMS1	NPC	0.351	0.213	0.408084	2.37492e-110	0.138
KLF2	NPC	0.283	0.145	0.529643	3.79164e-101	0.138
FANCG	NPC	0.308	0.17	0.269591	9.14587e-100	0.138
TIMM29	NPC	0.365	0.227	0.388964	1.63885e-91	0.138
HDDC3	NPC	0.413	0.275	0.310774	7.41201e-72	0.138
RNF166	NPC	0.281	0.144	0.300699	4.59709e-103	0.137
IMPDH2	NPC	0.754	0.617	1.28232	3.31287e-176	0.137
GNPNAT1	NPC	0.685	0.548	0.425438	1.35947e-114	0.137
ZNF326	NPC	0.675	0.538	0.628576	1.55564e-99	0.137
POLE2	NPC	0.313	0.176	0.348999	1.93852e-90	0.137
PKP4	NPC	0.447	0.31	0.433945	4.21243e-69	0.137
DYNLL2	NPC	0.5	0.363	0.264814	8.22129e-69	0.137
LEO1	NPC	0.447	0.31	0.36474	1.0676e-63	0.137
LAS1L	NPC	0.458	0.321	0.302511	2.85333e-55	0.137
ARHGAP42	NPC	0.307	0.17	0.696843	5.56362e-166	0.137
EED	NPC	0.352	0.215	0.405259	6.36102e-99	0.137
SH2D4A	NPC	0.358	0.221	0.366848	2.90529e-94	0.137
ZSWIM7	NPC	0.604	0.467	0.357685	1.45361e-75	0.137
ZNF576	NPC	0.414	0.277	0.335479	6.68968e-72	0.137
CSTF3	NPC	0.568	0.431	0.256246	2.11249e-59	0.137
ENOPH1	NPC	0.586	0.449	0.347625	8.15744e-52	0.137
IPO4	NPC	0.342	0.206	0.397411	6.04432e-82	0.136
B3GALT6	NPC	0.418	0.282	0.345518	1.68886e-86	0.136
DPCD	NPC	0.458	0.322	0.315924	1.10979e-74	0.136
NUDT16L1	NPC	0.521	0.385	0.537213	2.59574e-70	0.136
TELO2	NPC	0.405	0.269	0.330237	3.40294e-59	0.136
RBM22	NPC	0.494	0.358	0.335906	5.82773e-53	0.136
PSPC1	NPC	0.513	0.377	0.313081	2.98274e-43	0.136
KIF20A	NPC	0.325	0.189	0.430236	1.94054e-40	0.136
PSRC1	NPC	0.346	0.21	0.56985	1.30595e-63	0.136
SNAPC5	NPC	0.412	0.276	0.410735	1.89053e-69	0.136
MRPL17	NPC	0.861	0.726	3.01861	0	0.135
GGCT	NPC	0.806	0.671	0.353967	1.07057e-184	0.135
GLI2	NPC	0.222	0.087	0.376723	1.31596e-171	0.135
NAF1	NPC	0.316	0.181	0.415414	2.1525e-103	0.135
SLC35B1	NPC	0.662	0.527	0.556294	3.06201e-102	0.135
PUM3	NPC	0.674	0.539	0.773426	7.32774e-100	0.135
CHTOP	NPC	0.652	0.517	0.4996	2.23868e-79	0.135
CDC23	NPC	0.395	0.26	0.38755	7.05034e-70	0.135
WRAP53	NPC	0.322	0.187	0.32015	1.23443e-68	0.135
NOL11	NPC	0.616	0.481	0.475195	3.48406e-65	0.135
BAG3	NPC	0.479	0.344	0.376203	4.19449e-64	0.135
EEF2KMT	NPC	0.401	0.266	0.293991	4.72838e-64	0.135
DCPS	NPC	0.405	0.27	0.279997	2.88515e-59	0.135
HILPDA	NPC	0.518	0.383	0.352537	4.18557e-39	0.135
HIST2H2AC	NPC	0.301	0.166	0.918958	5.59485e-126	0.135
INPP1	NPC	0.351	0.216	0.622006	3.30864e-101	0.135
HOXA3	NPC	0.368	0.233	0.428465	1.64168e-74	0.135
INF2	NPC	0.595	0.46	0.444441	7.82603e-84	0.135
RBMX2	NPC	0.474	0.339	0.370452	2.0289e-72	0.135
TMEM223	NPC	0.573	0.438	0.40466	2.78383e-72	0.135
PAF1	NPC	0.473	0.338	0.272744	3.81817e-63	0.135
ACADM	NPC	0.548	0.414	0.281197	3.65922e-51	0.134
KLC2	NPC	0.342	0.208	0.332333	2.73736e-93	0.134
PSMD6	NPC	0.769	0.635	0.80181	9.16959e-190	0.134
SNRPA	NPC	0.798	0.664	0.989375	2.1756e-183	0.134
C1D	NPC	0.751	0.617	1.80346	2.52291e-118	0.134
MRPS36	NPC	0.697	0.563	0.883569	1.27019e-97	0.134
SMIM10L1	NPC	0.636	0.502	0.520093	9.33304e-93	0.134
CRELD2	NPC	0.609	0.475	0.680777	2.05468e-89	0.134
DPH7	NPC	0.387	0.253	0.307952	7.73339e-74	0.134
FBXO45	NPC	0.416	0.282	0.276764	1.17719e-72	0.134
GMPR2	NPC	0.405	0.271	0.30985	1.549e-71	0.134
INTS13	NPC	0.396	0.262	0.322477	2.85613e-71	0.134
THOC3	NPC	0.388	0.254	0.382966	2.47308e-65	0.134
NOL8	NPC	0.483	0.349	0.385352	3.6554e-62	0.134
PPA2	NPC	0.526	0.392	0.315937	2.27166e-50	0.134
NFYB	NPC	0.522	0.388	0.253751	3.37226e-47	0.134
FAM83D	NPC	0.383	0.249	0.655635	3.02392e-44	0.134
RNF121	NPC	0.362	0.228	0.429548	3.12424e-104	0.134
CCDC51	NPC	0.35	0.216	0.37967	6.2755e-88	0.134
ASNSD1	NPC	0.354	0.22	0.336053	4.97679e-87	0.134
MED30	NPC	0.359	0.225	0.40207	1.28993e-73	0.134
KDSR	NPC	0.602	0.468	0.540176	7.60735e-91	0.134
SNAP29	NPC	0.475	0.341	0.254831	3.25632e-76	0.134
PLEKHA3	NPC	0.6	0.466	0.261046	6.01811e-71	0.134
WDR33	NPC	0.567	0.433	0.49876	2.58215e-70	0.134
THUMPD3	NPC	0.475	0.341	0.443565	1.87692e-68	0.134
CUTC	NPC	0.342	0.209	0.400992	2.60485e-78	0.133
C8orf88	NPC	0.341	0.208	0.357935	8.98098e-74	0.133
RPS4Y1	NPC	0.48	0.347	13.9138	7.0858e-219	0.133
RUVBL1	NPC	0.828	0.695	1.55669	4.57616e-216	0.133
NOLC1	NPC	0.721	0.588	0.73144	8.241e-145	0.133
PHAX	NPC	0.742	0.609	0.736443	1.64918e-129	0.133
HYAL2	NPC	0.673	0.54	0.727691	2.82937e-109	0.133
CDK14	NPC	0.31	0.177	0.30487	2.38321e-106	0.133
ALKBH2	NPC	0.321	0.188	0.463413	9.254e-104	0.133
TCEAL3	NPC	0.528	0.395	0.412269	6.0238e-74	0.133
CDC5L	NPC	0.667	0.534	0.591452	3.23272e-73	0.133
DAP3	NPC	0.612	0.479	0.482877	1.22136e-69	0.133
WDR3	NPC	0.426	0.293	0.290564	2.16338e-58	0.133
ERCC2	NPC	0.351	0.218	0.346999	3.93153e-101	0.133
UCK1	NPC	0.358	0.225	0.307393	4.84115e-74	0.133
WDHD1	NPC	0.363	0.23	0.320794	3.68318e-72	0.133
TAF6	NPC	0.475	0.342	0.356661	1.16702e-63	0.133
RBM14	NPC	0.475	0.342	0.30647	2.59277e-54	0.133
VKORC1L1	NPC	0.547	0.415	0.296181	9.03886e-67	0.132
PRPSAP1	NPC	0.545	0.413	0.380956	1.23096e-48	0.132
PTPRB	NPC	0.201	0.069	0.392408	3.27172e-183	0.132
MRPL37	NPC	0.779	0.647	0.470203	1.05424e-150	0.132
AKR7A2	NPC	0.731	0.599	0.518005	4.12657e-116	0.132
ELP5	NPC	0.81	0.678	3.83359	1.50563e-109	0.132
GLCE	NPC	0.305	0.173	0.355937	6.43129e-108	0.132
NANS	NPC	0.709	0.577	0.417496	6.69593e-92	0.132
TBC1D4	NPC	0.334	0.202	0.307579	3.23905e-91	0.132
CBY1	NPC	0.428	0.296	0.280631	3.89068e-77	0.132
SART1	NPC	0.416	0.284	0.375805	3.74671e-70	0.132
KLHDC3	NPC	0.435	0.303	0.366218	1.29511e-61	0.132
TRMT1	NPC	0.393	0.261	0.272382	1.11736e-59	0.132
ECSIT	NPC	0.397	0.265	0.354905	3.98752e-59	0.132
NUP54	NPC	0.468	0.336	0.33389	9.22568e-54	0.132
CDC40	NPC	0.494	0.362	0.358202	4.7563e-51	0.132
CASP4	NPC	0.302	0.17	0.355814	1.194e-89	0.132
TMEM107	NPC	0.347	0.215	0.469542	1.63181e-83	0.132
MRPL16	NPC	0.6	0.468	0.435705	2.25885e-53	0.132
HAX1	NPC	0.785	0.654	0.674329	1.25309e-230	0.131
NDUFS3	NPC	0.795	0.664	1.36571	3.73124e-230	0.131
DHX29	NPC	0.687	0.556	0.630566	9.13561e-100	0.131
PLOD3	NPC	0.614	0.483	0.420312	6.59199e-74	0.131
HDGFL2	NPC	0.644	0.513	0.650578	1.26294e-71	0.131
ATG101	NPC	0.657	0.526	0.423847	1.61958e-71	0.131
NOL12	NPC	0.295	0.164	0.403633	5.42417e-105	0.131
ERLIN1	NPC	0.349	0.218	0.312093	1.52626e-77	0.131
NUP42	NPC	0.409	0.278	0.456913	3.76029e-61	0.131
MRPL9	NPC	0.763	0.633	0.887965	1.00507e-134	0.13
SASS6	NPC	0.315	0.185	0.410903	6.22224e-84	0.13
NMT2	NPC	0.417	0.287	3.01122	1.7118e-80	0.13
MRPL10	NPC	0.39	0.26	0.349746	3.17274e-70	0.13
ALG13	NPC	0.419	0.289	0.311986	2.1529e-67	0.13
COMMD8	NPC	0.646	0.516	0.377549	1.22608e-63	0.13
SCLT1	NPC	0.344	0.214	0.424536	5.79942e-61	0.13
BORCS8	NPC	0.589	0.459	0.32654	1.06347e-61	0.13
SFXN4	NPC	0.411	0.281	0.520034	9.48639e-56	0.13
RBFOX2	NPC	0.69	0.56	0.335179	5.95375e-103	0.13
MALSU1	NPC	0.797	0.668	1.94155	1.11846e-266	0.129
GRPEL1	NPC	0.802	0.673	0.827715	6.86009e-164	0.129
CHCHD3	NPC	0.774	0.645	0.850321	2.47088e-162	0.129
STEAP1	NPC	0.252	0.123	0.531679	3.06337e-107	0.129
RECQL	NPC	0.671	0.542	0.583089	6.65082e-90	0.129
RANBP3	NPC	0.386	0.257	0.281657	1.10919e-68	0.129
SKA1	NPC	0.328	0.199	0.310192	6.69416e-65	0.129
FAM229B	NPC	0.399	0.27	0.25065	2.19691e-61	0.129
NR2C2AP	NPC	0.365	0.236	0.358208	2.96924e-61	0.129
UTP14A	NPC	0.413	0.284	0.360144	1.74171e-60	0.129
CHCHD4	NPC	0.392	0.263	0.303044	5.56819e-58	0.129
ATG5	NPC	0.535	0.406	0.360189	1.28953e-48	0.129
QTRT1	NPC	0.363	0.234	0.364437	5.21611e-74	0.129
METTL2A	NPC	0.35	0.221	0.346981	3.7029e-73	0.129
CDK5RAP1	NPC	0.344	0.215	0.353485	4.69841e-69	0.129
DDX23	NPC	0.537	0.409	0.475025	4.4462e-50	0.128
C1orf109	NPC	0.338	0.21	0.35688	1.34624e-76	0.128
CPNE3	NPC	0.733	0.605	3.31823	2.3749e-204	0.128
TPRKB	NPC	0.821	0.693	0.952122	1.84578e-169	0.128
SH3RF1	NPC	0.419	0.291	0.347115	1.8007e-92	0.128
NIPA2	NPC	0.663	0.535	0.530571	5.95337e-92	0.128
NELFE	NPC	0.732	0.604	0.503928	8.81119e-91	0.128
RTCA	NPC	0.61	0.482	0.682482	9.0489e-79	0.128
RRP8	NPC	0.373	0.245	0.262008	5.47029e-76	0.128
TBL2	NPC	0.363	0.235	0.403579	7.70813e-76	0.128
PLPP5	NPC	0.461	0.333	0.339942	2.81593e-71	0.128
GAS2L1	NPC	0.381	0.253	0.311525	2.21153e-64	0.128
PTPMT1	NPC	0.498	0.37	0.404266	2.00058e-61	0.128
CAD	NPC	0.436	0.308	0.300658	2.92574e-56	0.128
NKIRAS2	NPC	0.459	0.331	0.26599	1.29748e-55	0.128
COMMD9	NPC	0.505	0.377	0.320747	1.89673e-49	0.128
HLTF	NPC	0.462	0.334	0.361676	4.29302e-34	0.128
MTG2	NPC	0.351	0.223	0.309194	3.22983e-82	0.128
CENPJ	NPC	0.332	0.205	0.412025	9.32835e-79	0.127
VBP1	NPC	0.803	0.676	0.804174	3.35495e-180	0.127
FGD4	NPC	0.249	0.122	0.397414	2.30063e-147	0.127
NDUFS4	NPC	0.766	0.639	0.905919	2.60878e-146	0.127
TCERG1	NPC	0.691	0.564	0.757282	1.61935e-84	0.127
POLDIP2	NPC	0.677	0.55	0.622472	3.96966e-80	0.127
XRCC1	NPC	0.318	0.191	0.304077	1.06582e-75	0.127
APMAP	NPC	0.612	0.485	0.729831	1.68925e-75	0.127
ELOA	NPC	0.466	0.339	0.349929	6.30098e-65	0.127
MECR	NPC	0.4	0.273	0.372185	3.83345e-59	0.127
INPP5A	NPC	0.359	0.232	0.330319	1.70083e-78	0.127
GEMIN5	NPC	0.357	0.23	0.372257	1.72761e-76	0.127
TBL3	NPC	0.355	0.228	0.327579	3.51036e-63	0.127
SFSWAP	NPC	0.533	0.407	0.373065	1.00972e-51	0.126
TEDC2	NPC	0.281	0.155	0.310691	6.74205e-86	0.126
DDX11	NPC	0.336	0.21	0.30934	4.85536e-79	0.126
MCAT	NPC	0.334	0.208	0.392717	3.07684e-77	0.126
NAA20	NPC	0.837	0.711	1.68029	5.226e-286	0.126
L3MBTL2	NPC	0.317	0.191	0.440122	1.16293e-94	0.126
NLE1	NPC	0.312	0.186	0.314938	1.15292e-75	0.126
XRCC2	NPC	0.315	0.189	0.345807	9.68097e-75	0.126
PRKAG1	NPC	0.453	0.327	0.320964	2.56973e-55	0.126
MED16	NPC	0.492	0.366	0.432378	1.20496e-54	0.126
ATPAF1	NPC	0.385	0.259	0.271994	2.18691e-54	0.126
TBCC	NPC	0.377	0.251	0.275486	2.5655e-54	0.126
TFB1M	NPC	0.395	0.269	0.263608	2.58832e-51	0.126
CTNNBL1	NPC	0.441	0.315	0.296294	9.77024e-49	0.126
UTP23	NPC	0.359	0.233	0.323574	8.57839e-71	0.126
GINS4	NPC	0.347	0.221	0.250561	8.97323e-62	0.126
TMEM203	NPC	0.586	0.46	0.706462	7.08457e-64	0.126
NOP14	NPC	0.582	0.456	0.623153	2.72642e-52	0.126
MPV17	NPC	0.559	0.434	0.367831	1.23942e-62	0.125
OIP5	NPC	0.273	0.148	0.32908	3.34363e-68	0.125
DPY30	NPC	0.773	0.648	0.622784	8.98384e-182	0.125
DNTTIP2	NPC	0.692	0.567	0.876285	2.5003e-76	0.125
RCE1	NPC	0.326	0.201	0.34743	5.23766e-73	0.125
ANAPC13	NPC	0.677	0.552	0.298119	4.02395e-69	0.125
CDC26	NPC	0.644	0.519	0.378972	1.90685e-65	0.125
RRP1B	NPC	0.678	0.553	0.355749	6.18476e-63	0.125
RCHY1	NPC	0.433	0.308	0.344468	4.10283e-58	0.125
DEAF1	NPC	0.409	0.284	0.257066	3.32543e-57	0.125
RBM10	NPC	0.446	0.321	0.297494	2.29249e-54	0.125
GYG1	NPC	0.463	0.338	0.28796	1.2069e-51	0.125
MTF2	NPC	0.529	0.404	0.357581	7.83261e-47	0.125
COX19	NPC	0.494	0.369	0.296365	2.29119e-38	0.125
SCFD1	NPC	0.564	0.439	0.328552	4.70394e-60	0.125
FGFR1OP2	NPC	0.566	0.441	0.251288	2.001e-56	0.125
DNAJB1	NPC	0.56	0.436	1.19186	1.60839e-76	0.124
SLC25A33	NPC	0.34	0.216	0.419733	1.26509e-71	0.124
PSMC4	NPC	0.804	0.68	1.63043	3.92219e-264	0.124
COA1	NPC	0.762	0.638	0.362939	1.97531e-108	0.124
CCDC138	NPC	0.264	0.14	0.397251	2.3102e-99	0.124
GTPBP3	NPC	0.318	0.194	0.37928	5.96767e-99	0.124
PPID	NPC	0.655	0.531	0.574056	2.16761e-77	0.124
SYS1	NPC	0.43	0.306	0.342165	3.98187e-60	0.124
SCAMP3	NPC	0.45	0.326	0.390091	8.09147e-60	0.124
UFL1	NPC	0.488	0.364	0.308514	4.57356e-59	0.124
C1GALT1C1	NPC	0.376	0.252	0.263926	2.33716e-57	0.124
RPE	NPC	0.461	0.337	0.275783	4.94303e-52	0.124
COMMD10	NPC	0.431	0.307	0.3018	2.36619e-48	0.124
ETV4	NPC	0.405	0.281	0.258972	4.60609e-45	0.124
NARS2	NPC	0.294	0.17	0.375778	5.02202e-94	0.124
SUV39H2	NPC	0.292	0.168	0.304395	6.56319e-75	0.124
DPH5	NPC	0.348	0.224	0.382865	6.49332e-67	0.124
AAAS	NPC	0.356	0.232	0.364556	1.13727e-58	0.124
TMEM222	NPC	0.406	0.283	0.400151	1.69856e-53	0.123
COA7	NPC	0.334	0.211	0.469244	1.65742e-62	0.123
EEF1E1	NPC	0.897	0.774	2.65348	0	0.123
DNMT1	NPC	0.923	0.8	0.827998	1.81891e-284	0.123
EIF2D	NPC	0.322	0.199	0.32757	9.76698e-75	0.123
EBAG9	NPC	0.369	0.246	0.345625	2.63909e-64	0.123
TIMM10B	NPC	0.426	0.303	0.258719	1.67469e-58	0.123
PNKP	NPC	0.525	0.402	0.321103	1.9481e-56	0.123
MARS	NPC	0.452	0.329	0.358178	8.4267e-55	0.123
YARS	NPC	0.613	0.49	0.325076	8.23984e-47	0.123
CPNE7	NPC	0.231	0.109	0.288761	2.01911e-102	0.122
CISD1	NPC	0.875	0.753	3.57413	0	0.122
PYCR3	NPC	0.259	0.137	0.255593	1.32401e-98	0.122
METTL3	NPC	0.364	0.242	0.426694	9.10743e-71	0.122
RAB4A	NPC	0.656	0.534	0.299514	1.02599e-63	0.122
SNAPC2	NPC	0.39	0.268	0.320172	4.2186e-56	0.122
HBS1L	NPC	0.518	0.396	0.283552	5.36551e-53	0.122
SDF2	NPC	0.531	0.41	0.327974	4.53813e-61	0.121
TMEM87A	NPC	0.537	0.416	0.333058	1.35774e-56	0.121
EFCAB2	NPC	0.233	0.112	0.372064	2.12472e-113	0.121
SMC3	NPC	0.877	0.756	1.28826	2.725e-197	0.121
HSD17B10	NPC	0.757	0.636	1.11551	2.02128e-181	0.121
HIST1H2BH	NPC	0.243	0.122	0.365459	1.4122e-109	0.121
UBE2J2	NPC	0.72	0.599	0.584028	1.83595e-93	0.121
LDOC1	NPC	0.435	0.314	0.276456	1.95793e-64	0.121
C8orf76	NPC	0.357	0.236	0.365496	1.49054e-59	0.121
LRRC42	NPC	0.419	0.298	0.360807	1.10527e-55	0.121
PSENEN	NPC	0.613	0.492	0.292912	2.6176e-48	0.121
CEP164	NPC	0.437	0.316	0.370996	1.41341e-47	0.121
HGH1	NPC	0.292	0.171	0.309665	3.95132e-73	0.121
PRELID2	NPC	0.281	0.161	0.333698	2.82005e-92	0.12
ALYREF	NPC	0.898	0.778	1.81405	0	0.12
TAF9	NPC	0.827	0.707	1.27965	6.36072e-211	0.12
PET117	NPC	0.298	0.178	0.322192	3.5117e-83	0.12
FANCL	NPC	0.308	0.188	0.35595	5.08106e-83	0.12
ZNHIT2	NPC	0.318	0.198	0.338701	8.05393e-75	0.12
TM2D3	NPC	0.408	0.288	0.333006	1.13283e-67	0.12
UBR7	NPC	0.321	0.201	0.293306	1.62005e-61	0.12
PHKG2	NPC	0.378	0.258	0.272106	2.15159e-53	0.12
OGFOD3	NPC	0.428	0.308	0.282426	4.86277e-50	0.12
PELO	NPC	0.498	0.378	0.330124	5.77982e-43	0.12
FLAD1	NPC	0.444	0.324	0.287683	4.8809e-40	0.12
IL11	NPC	0.433	0.313	6.62754	8.1489e-28	0.12
FAM160B1	NPC	0.291	0.171	0.312512	1.21661e-102	0.12
DCK	NPC	0.344	0.224	0.313739	2.94792e-69	0.12
NUFIP1	NPC	0.354	0.234	0.286771	2.02472e-56	0.12
TMEM259	NPC	0.57	0.45	0.267495	3.13456e-53	0.12
IWS1	NPC	0.581	0.461	0.629117	2.7194e-50	0.12
DERL2	NPC	0.683	0.564	1.07072	1.99547e-100	0.119
PRR7	NPC	0.402	0.283	0.288081	1.1652e-57	0.119
RPP38	NPC	0.401	0.282	0.290328	3.43642e-50	0.119
PPCDC	NPC	0.276	0.157	0.340055	8.15263e-84	0.119
VPS26B	NPC	0.343	0.224	0.288304	1.20892e-71	0.119
DCAF15	NPC	0.34	0.221	0.366655	3.1388e-61	0.119
PTGER4	NPC	0.151	0.032	0.459818	3.65957e-239	0.119
KCNK1	NPC	0.249	0.13	0.441641	1.35112e-113	0.119
TRAPPC12	NPC	0.354	0.235	0.319621	3.21714e-63	0.119
TBC1D7	NPC	0.381	0.262	0.300759	2.24717e-61	0.119
PTDSS2	NPC	0.365	0.246	0.305979	1.67746e-57	0.119
COA5	NPC	0.421	0.302	0.366731	1.5564e-51	0.119
GCFC2	NPC	0.289	0.17	0.296388	4.14426e-81	0.119
CMAS	NPC	0.583	0.464	0.42726	1.61766e-67	0.119
KTI12	NPC	0.276	0.158	0.435531	1.28012e-89	0.118
HS3ST3B1	NPC	0.15	0.032	0.371136	2.07214e-259	0.118
COMMD4	NPC	0.874	0.756	0.679588	1.68616e-202	0.118
FOSL1	NPC	0.767	0.649	3.61858	1.19097e-112	0.118
PTGES2	NPC	0.699	0.581	0.536534	2.70708e-64	0.118
UBAC2	NPC	0.391	0.273	0.272795	1.27484e-57	0.118
PCGF2	NPC	0.392	0.274	0.272474	4.29053e-55	0.118
MTX2	NPC	0.634	0.516	0.423197	5.02978e-55	0.118
SMIM13	NPC	0.391	0.273	0.260822	2.63622e-52	0.118
CDC16	NPC	0.518	0.4	0.265702	6.77663e-45	0.118
DEPDC1B	NPC	0.319	0.201	0.369682	1.49361e-30	0.118
GNL3	NPC	0.807	0.69	1.36787	1.99828e-182	0.117
APEX2	NPC	0.328	0.211	0.372267	3.45973e-90	0.117
CHST12	NPC	0.322	0.205	0.36068	3.38025e-78	0.117
BAIAP2	NPC	0.339	0.222	0.377831	4.58162e-78	0.117
TRMT2A	NPC	0.321	0.204	0.349594	2.05225e-73	0.117
JMJD4	NPC	0.326	0.209	0.279231	2.85309e-66	0.117
TMEM218	NPC	0.338	0.221	0.32024	1.08824e-63	0.117
BAK1	NPC	0.324	0.207	0.329684	1.57931e-61	0.117
MRPL13	NPC	0.861	0.744	1.11277	9.10818e-276	0.117
MESP1	NPC	0.236	0.119	0.469164	1.04606e-110	0.117
NEIL3	NPC	0.251	0.134	0.312315	2.19312e-86	0.117
NRM	NPC	0.293	0.176	0.310799	3.47723e-73	0.117
LONP1	NPC	0.506	0.389	0.264447	1.90432e-36	0.117
LARP7	NPC	0.601	0.484	0.263922	3.4601e-30	0.117
ARL1	NPC	0.686	0.57	0.568204	6.57836e-85	0.116
SLC35B2	NPC	0.406	0.29	0.329109	2.29856e-60	0.116
AARS	NPC	0.4	0.284	0.261951	8.98364e-49	0.116
CENPQ	NPC	0.268	0.152	0.36378	2.12477e-83	0.116
C1orf43	NPC	0.791	0.675	2.9236	4.03458e-222	0.116
FAT1	NPC	0.769	0.653	5.7011	2.54361e-207	0.116
HIKESHI	NPC	0.716	0.6	1.12121	2.20561e-107	0.116
ZCCHC17	NPC	0.718	0.602	0.58116	5.78553e-85	0.116
TMEM39B	NPC	0.295	0.179	0.288584	1.58727e-67	0.116
SNW1	NPC	0.725	0.609	0.45829	1.50945e-63	0.116
NUP35	NPC	0.301	0.185	0.302034	2.93894e-58	0.116
CCDC12	NPC	0.662	0.546	0.295264	2.45431e-57	0.116
ABHD11	NPC	0.39	0.274	0.29855	1.88631e-49	0.116
VPS36	NPC	0.51	0.394	0.280669	2.20342e-44	0.116
CRCP	NPC	0.411	0.295	0.257458	7.89559e-43	0.116
SDAD1	NPC	0.489	0.373	0.429166	4.29979e-40	0.116
NUP155	NPC	0.435	0.319	0.301484	2.23805e-38	0.116
CIAO1	NPC	0.686	0.571	0.962686	6.0493e-93	0.115
NFIA	NPC	0.265	0.15	0.821996	1.98198e-72	0.115
VANGL1	NPC	0.339	0.224	0.269705	1.7793e-52	0.115
NDUFB6	NPC	0.851	0.736	2.62415	0	0.115
RNASEH2C	NPC	0.865	0.75	1.68964	2.23468e-268	0.115
METTL5	NPC	0.815	0.7	1.65355	3.95909e-236	0.115
TCEAL8	NPC	0.711	0.596	0.583585	2.15332e-120	0.115
IER3IP1	NPC	0.794	0.679	0.777968	9.13878e-115	0.115
UQCRC2	NPC	0.749	0.634	0.741786	6.68572e-108	0.115
EMC1	NPC	0.408	0.293	0.266313	5.95689e-55	0.115
ATG12	NPC	0.628	0.513	0.510221	2.88176e-50	0.115
SURF6	NPC	0.396	0.282	0.276955	1.3044e-43	0.114
B4GAT1	NPC	0.258	0.144	0.333633	2.62454e-91	0.114
NUDT11	NPC	0.219	0.105	0.295395	1.79869e-101	0.114
MRPL32	NPC	0.742	0.628	1.23249	2.50449e-125	0.114
NOC2L	NPC	0.747	0.633	0.966286	1.43317e-116	0.114
EIF2A	NPC	0.692	0.578	0.48484	1.14923e-68	0.114
GPATCH11	NPC	0.315	0.201	0.260401	3.54915e-60	0.114
NFYC	NPC	0.392	0.278	0.32219	3.06211e-50	0.114
CARS2	NPC	0.586	0.472	0.267405	2.08976e-44	0.114
RIN1	NPC	0.262	0.149	0.276101	2.30744e-86	0.113
CHAF1B	NPC	0.278	0.165	0.268086	5.31017e-71	0.113
GPN2	NPC	0.328	0.215	0.256904	4.25347e-56	0.113
KHK	NPC	0.196	0.083	0.346194	2.51839e-112	0.113
SNRPA1	NPC	0.891	0.778	1.41109	0	0.113
ORMDL1	NPC	0.8	0.687	1.27301	3.13516e-250	0.113
EDNRA	NPC	0.178	0.065	0.269604	2.0235e-151	0.113
BCAP29	NPC	0.73	0.617	0.368962	1.89709e-94	0.113
RPP40	NPC	0.286	0.173	0.307412	2.77348e-77	0.113
C14orf119	NPC	0.67	0.557	0.331171	8.3067e-70	0.113
HOXA5	NPC	0.296	0.183	0.842551	2.43833e-62	0.113
CETN3	NPC	0.302	0.189	0.297958	1.60295e-56	0.113
TTC9C	NPC	0.367	0.254	0.288834	4.03571e-52	0.113
BRCC3	NPC	0.383	0.27	0.269674	6.82497e-51	0.113
MRPS27	NPC	0.474	0.361	0.355348	1.3563e-35	0.113
ING5	NPC	0.345	0.232	0.327283	9.31969e-56	0.113
GORASP2	NPC	0.58	0.467	0.412857	1.27992e-61	0.113
TMCO3	NPC	0.567	0.454	0.797445	2.91843e-44	0.113
SS18	NPC	0.532	0.42	0.253559	4.99799e-31	0.112
LYPLAL1	NPC	0.326	0.214	0.29128	1.50164e-56	0.112
CDK4	NPC	0.912	0.8	0.357506	7.09021e-284	0.112
DKC1	NPC	0.84	0.728	2.30289	8.3463e-121	0.112
CTCF	NPC	0.657	0.545	0.308589	5.01842e-60	0.112
PRKRA	NPC	0.584	0.472	0.377491	2.9304e-49	0.112
HIBCH	NPC	0.382	0.27	0.334183	1.94588e-44	0.112
SCNM1	NPC	0.423	0.311	0.296381	2.82167e-43	0.112
C11orf68	NPC	0.419	0.307	0.310422	9.75528e-41	0.112
SCYL1	NPC	0.508	0.396	0.277848	1.55377e-39	0.112
TNPO3	NPC	0.51	0.398	1.74931	1.25518e-27	0.112
NDUFA5	NPC	0.801	0.69	0.424995	1.89704e-161	0.111
TMEM214	NPC	0.393	0.282	0.308593	3.9891e-63	0.111
TTK	NPC	0.399	0.288	1.12589	0.595671	0.111
PDCD2L	NPC	0.253	0.142	0.319545	2.23062e-77	0.111
MID1IP1	NPC	0.28	0.169	0.443532	1.39208e-75	0.111
POLD1	NPC	0.262	0.151	0.309992	2.97218e-69	0.111
ARHGEF1	NPC	0.335	0.224	0.349931	1.52683e-67	0.111
DHPS	NPC	0.262	0.151	0.294626	1.23776e-66	0.111
EFEMP1	NPC	0.218	0.107	0.417398	5.87582e-98	0.111
NDUFB3	NPC	0.842	0.731	0.970117	2.7654e-200	0.111
NIT1	NPC	0.291	0.18	0.422947	6.90216e-75	0.111
C17orf58	NPC	0.29	0.179	0.310445	3.19235e-65	0.111
ABI2	NPC	0.652	0.541	0.280046	3.83683e-61	0.111
KIAA1143	NPC	0.364	0.253	0.251754	6.19787e-45	0.111
UBL7	NPC	0.38	0.269	0.254725	1.35125e-39	0.111
GSS	NPC	0.504	0.393	0.436478	4.93436e-33	0.111
MRPS31	NPC	0.41	0.299	0.289181	1.08666e-31	0.111
NUP85	NPC	0.344	0.233	0.295657	2.32725e-42	0.111
RPP25L	NPC	0.327	0.217	0.435791	8.07734e-52	0.11
ALKBH3	NPC	0.314	0.204	0.255851	5.42598e-49	0.11
TCF7L1	NPC	0.191	0.081	0.305205	3.14139e-132	0.11
DTYMK	NPC	0.959	0.849	1.75626	0	0.11
PGP	NPC	0.872	0.762	0.841834	4.79168e-246	0.11
POLR2H	NPC	0.85	0.74	3.58954	1.36666e-242	0.11
NAE1	NPC	0.825	0.715	0.860689	6.45915e-164	0.11
PSMD3	NPC	0.776	0.666	0.622296	1.87204e-162	0.11
C18orf21	NPC	0.282	0.172	0.404604	1.03089e-69	0.11
FBXO17	NPC	0.36	0.25	0.321782	1.89921e-56	0.11
SLC25A38	NPC	0.304	0.194	0.287988	2.22221e-52	0.11
MTHFD1L	NPC	0.689	0.579	0.308155	5.44483e-49	0.11
POLR2G	NPC	0.628	0.518	0.293751	2.79858e-42	0.11
VASN	NPC	0.198	0.089	0.351319	1.91015e-117	0.109
CCNE1	NPC	0.263	0.154	0.453077	6.17079e-107	0.109
EIF1AY	NPC	0.313	0.204	1.53015	5.24348e-103	0.109
RABEPK	NPC	0.331	0.222	0.26773	1.29893e-54	0.109
ALG14	NPC	0.34	0.231	0.253745	1.82738e-46	0.109
LSM1	NPC	0.83	0.721	1.06725	6.31421e-266	0.109
VPS25	NPC	0.834	0.725	1.57862	1.79761e-243	0.109
FAM207A	NPC	0.791	0.682	0.694612	6.33665e-131	0.109
HARS	NPC	0.749	0.64	0.521257	8.99742e-109	0.109
MPLKIP	NPC	0.743	0.634	0.534414	1.03233e-105	0.109
LYSMD2	NPC	0.237	0.128	0.335049	2.02588e-88	0.109
PRKAR2B	NPC	0.235	0.126	0.284544	3.31231e-84	0.109
EMC3	NPC	0.661	0.552	0.596786	8.53098e-49	0.109
MRPS28	NPC	0.356	0.247	0.267303	1.87909e-41	0.109
FAHD1	NPC	0.417	0.308	0.262498	9.09507e-36	0.109
PPP6C	NPC	0.506	0.397	0.268703	1.06153e-27	0.109
CPSF6	NPC	0.68	0.572	0.333715	1.80534e-39	0.108
HDDC2	NPC	0.767	0.659	0.334644	1.81463e-127	0.108
UPF3A	NPC	0.729	0.621	0.300654	1.31124e-80	0.108
PAXBP1	NPC	0.388	0.28	0.269044	2.65668e-41	0.108
CTDSPL2	NPC	0.379	0.271	0.256655	9.86583e-41	0.108
DNA2	NPC	0.257	0.15	0.265906	4.28071e-71	0.107
TMEM177	NPC	0.272	0.165	0.256916	2.63529e-57	0.107
HTRA2	NPC	0.336	0.229	0.264257	4.62801e-48	0.107
PDSS1	NPC	0.315	0.208	0.263676	3.51894e-43	0.107
MRTO4	NPC	0.913	0.806	0.940942	0	0.107
MRPS26	NPC	0.83	0.723	0.526798	1.15738e-192	0.107
CBR1	NPC	0.755	0.648	1.20727	4.2417e-130	0.107
ATRAID	NPC	0.756	0.649	1.79502	2.19435e-117	0.107
EIF2B4	NPC	0.347	0.24	0.256888	7.97977e-52	0.107
GTF2F1	NPC	0.593	0.486	0.291812	3.15449e-43	0.107
HSPA1A	NPC	0.405	0.299	7.35406	2.72937e-51	0.106
RDH11	NPC	0.547	0.441	0.373187	8.74504e-45	0.106
MTERF3	NPC	0.248	0.142	0.293242	3.56676e-71	0.106
UTP25	NPC	0.322	0.216	0.302554	1.30677e-60	0.106
NDUFAF1	NPC	0.315	0.209	0.330635	3.70709e-52	0.106
LSM6	NPC	0.857	0.751	1.043	6.61228e-168	0.106
MSANTD2	NPC	0.239	0.133	0.307536	2.37515e-81	0.106
BOD1L1	NPC	0.642	0.536	0.337078	2.79517e-54	0.106
MASTL	NPC	0.298	0.192	0.28657	3.5304e-53	0.106
CRYZL1	NPC	0.349	0.243	0.302736	8.13234e-50	0.106
MTRES1	NPC	0.354	0.248	0.252478	5.57328e-47	0.106
RBBP6	NPC	0.584	0.478	1.14286	3.2232e-28	0.106
LAMB1	NPC	0.683	0.578	1.90143	6.17723e-61	0.105
CEP295	NPC	0.265	0.16	0.297931	2.25425e-74	0.105
DHODH	NPC	0.25	0.145	0.289343	7.53453e-66	0.105
EBNA1BP2	NPC	0.91	0.805	0.304895	0	0.105
MRPL40	NPC	0.84	0.735	0.401168	2.23269e-290	0.105
TECR	NPC	0.79	0.685	0.37022	3.99819e-115	0.105
LLPH	NPC	0.732	0.627	0.63204	2.9608e-64	0.105
MPP5	NPC	0.365	0.26	0.317972	2.41977e-58	0.105
CHCHD6	NPC	0.348	0.243	0.290011	6.6068e-49	0.105
SLC7A6OS	NPC	0.344	0.239	0.259681	2.23459e-37	0.105
INCENP	NPC	0.288	0.183	0.304064	8.133e-37	0.105
DMAC2	NPC	0.404	0.3	0.279097	4.34584e-31	0.104
SLC25A22	NPC	0.263	0.159	0.257953	8.34022e-67	0.104
ANP32A	NPC	0.904	0.8	1.79404	0	0.104
MRPS18C	NPC	0.875	0.771	2.40486	4.46648e-292	0.104
TIMM10	NPC	0.882	0.778	0.839591	1.85359e-231	0.104
AUP1	NPC	0.771	0.667	0.425773	9.29338e-113	0.104
SMG9	NPC	0.293	0.189	0.259269	4.59576e-59	0.104
PPHLN1	NPC	0.648	0.544	0.520143	7.19821e-44	0.104
SNRNP27	NPC	0.604	0.5	0.305515	2.95735e-36	0.104
ALG8	NPC	0.41	0.306	0.281365	5.24076e-36	0.104
BLVRA	NPC	0.479	0.375	0.289404	1.16191e-25	0.104
GATAD1	NPC	0.549	0.446	0.30137	6.39846e-40	0.103
TSKU	NPC	0.256	0.153	0.360859	2.39625e-85	0.103
PIGL	NPC	0.255	0.152	0.279109	8.21827e-59	0.103
PPP2CA	NPC	0.825	0.722	0.917815	3.74998e-152	0.103
BUD23	NPC	0.765	0.662	1.2306	2.01891e-109	0.103
DNAJB11	NPC	0.709	0.606	1.09505	2.12178e-109	0.103
RBM18	NPC	0.372	0.269	0.254524	2.0167e-42	0.103
WASHC3	NPC	0.408	0.305	0.321867	3.06271e-39	0.103
ATPSCKMT	NPC	0.275	0.173	0.253598	3.65393e-57	0.102
AHCTF1	NPC	0.539	0.437	0.329148	4.67063e-34	0.102
PIR	NPC	0.225	0.123	0.280342	1.97375e-72	0.102
GCAT	NPC	0.256	0.154	0.260645	2.88734e-58	0.102
THEM4	NPC	0.311	0.209	0.743074	2.03448e-46	0.102
KIF18B	NPC	0.211	0.109	0.367049	6.21915e-73	0.102
MRPL15	NPC	0.879	0.777	6.95154	0	0.102
SRPK1	NPC	0.861	0.759	1.22066	2.42089e-172	0.102
TMEM161A	NPC	0.286	0.184	0.273446	7.68102e-59	0.102
TTC14	NPC	0.434	0.332	21.4593	7.85227e-46	0.102
GON7	NPC	0.344	0.242	0.256133	1.38808e-42	0.102
NAA15	NPC	0.644	0.542	0.456599	2.85988e-35	0.102
DDX27	NPC	0.617	0.515	0.355084	2.13674e-31	0.102
PAICS	NPC	0.934	0.833	1.20794	2.97802e-292	0.101
CLNS1A	NPC	0.81	0.709	0.597515	1.33711e-151	0.101
KARS	NPC	0.675	0.574	0.351146	8.44586e-52	0.101
RNPEP	NPC	0.562	0.461	0.252442	5.26152e-26	0.101
SPINDOC	NPC	0.262	0.161	0.26442	3.40997e-59	0.101
RPUSD2	NPC	0.268	0.167	0.351557	8.02331e-55	0.101
DDX3Y	NPC	0.207	0.106	0.356023	2.86638e-67	0.101
NOP56	NPC	0.947	0.846	2.60836	0	0.101
CDC123	NPC	0.856	0.755	2.33849	1.28677e-254	0.101
GTPBP4	NPC	0.865	0.764	4.70891	8.75286e-248	0.101
SUGT1	NPC	0.832	0.731	1.80596	4.79383e-229	0.101
ELOVL1	NPC	0.777	0.676	3.4243	5.12349e-166	0.101
BMS1	NPC	0.628	0.527	0.717823	2.45959e-50	0.101
PIF1	NPC	0.285	0.184	0.603094	6.56312e-36	0.101
MRPS11	NPC	0.8	0.7	0.880485	1.70267e-161	0.1
TMEM192	NPC	0.341	0.241	0.261947	3.61276e-44	0.1
POLR3A	NPC	0.385	0.285	0.387714	3.15589e-35	0.1
SEH1L	NPC	0.385	0.285	0.297124	4.36362e-34	0.1
PAQR4	NPC	0.23	0.13	0.309494	6.88115e-64	0.1
DOLK	NPC	0.269	0.169	0.306453	7.66364e-59	0.1
CACYBP	NPC	0.956	0.856	2.91528	0	0.1
MRPS7	NPC	0.848	0.748	2.1541	0	0.1
LSM8	NPC	0.869	0.769	2.2169	1.62605e-291	0.1
MED10	NPC	0.778	0.678	8.70847	2.61395e-114	0.1
MEA1	NPC	0.762	0.662	0.738967	1.29852e-108	0.1
SMIM7	NPC	0.76	0.66	1.11585	4.37624e-83	0.1
NAT10	NPC	0.292	0.192	0.274839	8.25621e-55	0.1
MKRN2	NPC	0.302	0.202	0.265577	3.70975e-51	0.1
ACTL6A	NPC	0.723	0.623	0.387596	2.67176e-35	0.1
CCDC18	NPC	0.285	0.185	0.298357	1.06595e-33	0.1
CCN2	NPC	0.79	0.691	9.59816	6.21075e-238	0.099
BZW2	NPC	0.812	0.713	0.931373	5.19906e-126	0.099
RTL10	NPC	0.244	0.145	0.265208	4.48556e-70	0.099
RIF1	NPC	0.786	0.687	0.487268	5.64567e-89	0.099
AP3M2	NPC	0.34	0.242	0.287466	3.66425e-42	0.098
EIF2S1	NPC	0.883	0.785	1.29471	6.36276e-257	0.098
PSMG2	NPC	0.757	0.659	0.542043	6.23034e-85	0.098
FAM171A1	NPC	0.374	0.276	0.29394	1.77376e-49	0.098
NDUFB5	NPC	0.786	0.689	0.47861	2.80363e-132	0.097
FAM161A	NPC	0.249	0.152	0.271187	1.15875e-63	0.097
FANCE	NPC	0.173	0.076	0.257703	1.55273e-96	0.097
NT5C	NPC	0.848	0.751	0.432528	1.26697e-291	0.097
UBE2V2	NPC	0.87	0.773	1.88129	4.82371e-267	0.097
MESD	NPC	0.855	0.758	0.962241	3.52813e-221	0.097
SMARCB1	NPC	0.814	0.717	0.514235	4.61226e-125	0.097
ERGIC2	NPC	0.773	0.676	0.89834	2.14966e-116	0.097
FBL	NPC	0.862	0.765	0.776093	1.96688e-93	0.097
C11orf1	NPC	0.357	0.26	0.307516	2.59903e-34	0.097
TNS2	NPC	0.143	0.047	0.30615	3.97822e-141	0.096
UBA2	NPC	0.818	0.722	0.839037	1.19997e-138	0.096
PRPF38B	NPC	0.708	0.612	0.629186	1.67208e-59	0.096
EMC4	NPC	0.794	0.699	1.18165	1.02448e-165	0.095
TBRG1	NPC	0.453	0.358	0.257759	1.18733e-26	0.095
SLC66A1L	NPC	0.171	0.076	0.274684	8.56423e-105	0.095
SERTAD4	NPC	0.233	0.138	0.254309	7.22953e-64	0.095
KATNB1	NPC	0.249	0.154	0.275914	2.4145e-60	0.095
ARV1	NPC	0.301	0.206	0.302182	1.33814e-43	0.095
HNRNPH3	NPC	0.939	0.844	2.10009	0	0.095
SRSF4	NPC	0.844	0.749	1.09571	2.71346e-163	0.095
DEF8	NPC	0.821	0.726	0.39437	5.30965e-129	0.095
PDZD11	NPC	0.654	0.559	0.253402	2.53018e-34	0.095
PIN4	NPC	0.724	0.629	1.99159	5.01358e-23	0.095
TM4SF1	NPC	0.936	0.842	5.268	1.514e-152	0.094
NUDT5	NPC	0.812	0.718	0.276346	2.33479e-96	0.094
CWC25	NPC	0.338	0.244	0.256254	1.81896e-41	0.094
PPT2	NPC	0.165	0.071	0.257507	1.91063e-116	0.094
PLAAT1	NPC	0.147	0.053	0.297519	2.39274e-110	0.094
THOC7	NPC	0.875	0.781	2.61062	1.04736e-292	0.094
MRPS23	NPC	0.837	0.743	1.01267	2.11974e-226	0.094
RRP36	NPC	0.85	0.756	0.75806	3.81526e-196	0.094
TWF2	NPC	0.688	0.594	0.339642	4.22892e-48	0.094
PCBD2	NPC	0.296	0.202	0.257632	7.26152e-40	0.094
ACIN1	NPC	0.652	0.558	0.4949	1.15997e-38	0.094
SAFB	NPC	0.651	0.557	0.321244	1.4383e-32	0.094
RPL26L1	NPC	0.928	0.835	2.6973	0	0.093
ABCE1	NPC	0.918	0.825	1.74268	8.50946e-292	0.093
PPP1CC	NPC	0.911	0.818	0.29474	1.76882e-189	0.093
CDC27	NPC	0.658	0.565	0.329184	1.56441e-26	0.093
ATXN7L3B	NPC	0.532	0.439	0.391343	5.13931e-24	0.093
MRPL18	NPC	0.882	0.789	1.93568	1.09264e-292	0.093
MCTS1	NPC	0.853	0.76	1.42351	1.35631e-188	0.093
STIP1	NPC	0.902	0.809	1.22591	7.32187e-166	0.093
MRPL43	NPC	0.822	0.729	1.0157	8.52648e-154	0.093
TIAL1	NPC	0.766	0.673	0.285038	2.39756e-106	0.093
SEPTIN10	NPC	0.699	0.606	0.397264	2.73703e-44	0.093
UBE2E3	NPC	0.927	0.835	7.053	0	0.092
HSPH1	NPC	0.925	0.833	6.26956	3.88908e-169	0.092
KPNA2	NPC	0.931	0.839	2.23359	3.06179e-142	0.092
FAM192A	NPC	0.663	0.571	0.566908	1.24747e-40	0.092
PRDM8	NPC	0.166	0.074	0.37389	5.23132e-86	0.092
E2F8	NPC	0.2	0.108	0.254761	3.78611e-66	0.092
ING1	NPC	0.263	0.171	0.361351	8.21935e-46	0.092
RMI1	NPC	0.299	0.207	3.78085	1.43442e-37	0.092
PSMC6	NPC	0.865	0.773	0.786786	9.30134e-217	0.092
PSMD12	NPC	0.887	0.795	2.02977	2.22302e-207	0.092
MRPL4	NPC	0.84	0.748	6.2987	4.37059e-151	0.092
CWC15	NPC	0.838	0.746	0.592118	2.90596e-117	0.092
MRPL19	NPC	0.778	0.686	1.02011	3.0453e-100	0.092
MRPL34	NPC	0.803	0.712	0.56838	3.30268e-122	0.091
ABRAXAS1	NPC	0.295	0.204	0.374339	5.22015e-40	0.091
SBDS	NPC	0.817	0.726	0.340963	1.29132e-148	0.091
TRA2B	NPC	0.853	0.762	1.06781	1.06559e-136	0.091
RBBP7	NPC	0.825	0.734	0.418442	1.85641e-74	0.091
ECHDC1	NPC	0.783	0.693	0.36231	4.50523e-84	0.09
CCDC85C	NPC	0.21	0.12	0.296819	1.05397e-53	0.09
ZNF830	NPC	0.305	0.215	0.430228	2.45037e-29	0.09
PHF20	NPC	0.519	0.43	0.29004	2.49638e-14	0.089
HPDL	NPC	0.128	0.039	0.32233	3.20821e-130	0.089
COPZ1	NPC	0.824	0.735	0.378923	1.61981e-202	0.089
NCOR1	NPC	0.831	0.742	1.00289	1.89508e-145	0.089
PWP1	NPC	0.738	0.649	1.0653	2.22078e-79	0.089
ANAPC5	NPC	0.755	0.666	0.364164	5.19884e-67	0.089
GOLT1B	NPC	0.587	0.498	1.30615	3.46415e-29	0.089
BAZ1B	NPC	0.838	0.75	0.567042	2.3875e-88	0.088
AIMP1	NPC	0.799	0.712	0.321033	2.69382e-81	0.087
ANAPC15	NPC	0.781	0.694	0.822449	4.53938e-42	0.087
MRPL28	NPC	0.858	0.771	1.61859	6.47878e-221	0.087
CISD2	NPC	0.832	0.745	1.31454	2.46742e-153	0.087
COPS2	NPC	0.757	0.67	0.96771	7.65799e-77	0.087
USP16	NPC	0.756	0.669	0.712156	4.67675e-57	0.087
TRIM28	NPC	0.925	0.839	2.32658	1.28452e-270	0.086
KCNJ2	NPC	0.109	0.023	1.40564	2.61295e-171	0.086
TIPRL	NPC	0.729	0.643	0.796678	3.13386e-54	0.086
SELENOK	NPC	0.788	0.703	0.702835	7.65136e-133	0.085
HAUS2	NPC	0.342	0.257	25.1014	7.09098e-24	0.085
SRP19	NPC	0.812	0.728	1.28433	1.33299e-145	0.084
RAB8A	NPC	0.767	0.683	0.730052	1.3418e-48	0.084
RPL36A	NPC	0.831	0.747	4.50967	4.77944e-34	0.084
PSMC1	NPC	0.892	0.809	2.30966	0	0.083
CNIH1	NPC	0.76	0.677	0.90823	1.27208e-80	0.083
MRPL36	NPC	0.892	0.81	7.32069	0	0.082
UFD1	NPC	0.818	0.736	0.968134	2.89578e-106	0.082
TAF15	NPC	0.685	0.604	0.312108	2.80154e-34	0.081
MT1E	NPC	0.965	0.885	24.8573	3.31073e-105	0.08
CCDC25	NPC	0.719	0.639	0.30617	1.39268e-33	0.08
ZRANB2	NPC	0.784	0.705	0.565552	1.00194e-58	0.079
ADH5	NPC	0.874	0.795	1.12435	3.70117e-226	0.079
PCMT1	NPC	0.862	0.783	0.747641	9.62881e-183	0.079
BTF3L4	NPC	0.846	0.767	0.859265	8.85491e-145	0.079
COX17	NPC	0.853	0.774	0.269405	8.29555e-91	0.079
ELAVL1	NPC	0.837	0.758	0.392895	3.66022e-78	0.079
KRAS	NPC	0.637	0.558	0.259121	2.4262e-15	0.079
SSB	NPC	0.927	0.849	6.30296	0	0.078
SRSF10	NPC	0.929	0.851	0.926153	1.27311e-246	0.078
GRK5	NPC	0.126	0.048	0.352764	3.50678e-113	0.078
DUT	NPC	0.969	0.891	3.18305	0	0.078
RARS	NPC	0.82	0.742	0.526651	2.67837e-121	0.078
PPP4R2	NPC	0.706	0.628	0.308856	2.18576e-42	0.078
PSMD11	NPC	0.895	0.818	1.48414	7.83135e-230	0.077
PON2	NPC	0.81	0.733	0.828147	2.58064e-97	0.077
SCX	NPC	0.13	0.053	8.07749	1.35926e-58	0.077
FDXR	NPC	0.284	0.207	0.297936	1.27175e-27	0.077
VDAC3	NPC	0.939	0.862	0.387102	0	0.077
SUMO3	NPC	0.87	0.793	1.34827	2.88935e-91	0.077
SLC7A2	NPC	0.177	0.101	3.20407	1.34871e-35	0.076
RBIS	NPC	0.857	0.781	1.17378	4.12915e-143	0.076
RTCB	NPC	0.761	0.685	0.587268	1.64515e-56	0.076
MMADHC	NPC	0.905	0.83	0.385973	3.27227e-242	0.075
MRPL47	NPC	0.894	0.819	0.322961	9.07227e-148	0.075
TRIM27	NPC	0.547	0.472	0.330636	1.91476e-10	0.075
MEIOB	NPC	0.113	0.038	0.282258	1.2702e-70	0.075
TCEAL9	NPC	0.743	0.668	0.694506	1.76982e-86	0.075
CCAR1	NPC	0.806	0.732	0.606263	2.4867e-64	0.074
GCSH	NPC	0.869	0.795	0.47114	2.45476e-165	0.074
PSMB4	NPC	0.821	0.747	0.466746	4.98528e-122	0.074
TXNDC9	NPC	0.785	0.712	0.662211	1.3385e-64	0.073
NOG	NPC	0.192	0.119	1.1174	6.10764e-51	0.073
DDX46	NPC	0.941	0.868	3.54049	4.36908e-236	0.073
MRPS16	NPC	0.866	0.793	1.76253	3.95632e-153	0.073
PSMD14	NPC	0.869	0.796	0.497883	1.8823e-122	0.073
TXN2	NPC	0.859	0.786	0.54415	1.42411e-121	0.073
PHF3	NPC	0.583	0.51	0.342202	1.7414e-22	0.073
MRPL12	NPC	0.936	0.864	2.76388	0	0.072
NDUFAB1	NPC	0.961	0.889	2.32311	0	0.072
NDUFS7	NPC	0.855	0.783	0.303866	1.45729e-106	0.072
MANF	NPC	0.909	0.838	16.083	4.51587e-300	0.071
PIN1	NPC	0.915	0.844	0.396196	3.62166e-240	0.071
MVD	NPC	0.377	0.306	0.411837	1.69977e-05	0.071
SELENOF	NPC	0.839	0.768	0.96636	6.36532e-134	0.071
PDHA1	NPC	0.705	0.634	0.384517	7.07179e-24	0.071
KRBOX1	NPC	0.227	0.157	0.562175	9.78663e-31	0.07
NTPCR	NPC	0.422	0.352	0.485894	7.66239e-11	0.07
DHX9	NPC	0.858	0.788	0.367511	2.09223e-65	0.07
TXNL1	NPC	0.897	0.828	3.94772	1.41929e-270	0.069
RTF2	NPC	0.805	0.736	0.307113	2.03791e-62	0.069
COA4	NPC	0.916	0.848	1.1208	5.25942e-241	0.068
MPG	NPC	0.822	0.754	1.97124	3.68185e-137	0.068
HACD3	NPC	0.87	0.802	3.09704	1.78356e-111	0.068
MAPK1IP1L	NPC	0.741	0.673	0.263655	3.42298e-34	0.068
DHX15	NPC	0.732	0.664	0.286866	1.774e-17	0.068
ARPC5L	NPC	0.922	0.855	1.65173	1.99682e-221	0.067
POLR2K	NPC	0.88	0.813	0.492975	2.20905e-116	0.067
FXR1	NPC	0.854	0.787	0.730866	4.21372e-79	0.067
NR2F6	NPC	0.734	0.667	0.333969	3.10313e-28	0.067
CARHSP1	NPC	0.932	0.866	0.384675	6.42481e-184	0.066
EIF4E2	NPC	0.808	0.742	1.21301	2.41934e-88	0.066
CENPX	NPC	0.953	0.887	1.87184	4.29162e-291	0.066
UBE2N	NPC	0.934	0.869	4.23245	0	0.065
MRPL27	NPC	0.909	0.844	0.538523	4.65845e-272	0.065
POLR2J	NPC	0.914	0.849	1.88797	1.62089e-215	0.065
MRGPRF	NPC	0.107	0.042	0.260549	1.74942e-67	0.065
PSME4	NPC	0.491	0.427	0.365328	2.17759e-09	0.064
ILF2	NPC	0.964	0.9	2.9683	0	0.064
CCT7	NPC	0.954	0.89	0.278223	0	0.064
EMC6	NPC	0.913	0.85	1.23031	2.47326e-285	0.063
LMAN1	NPC	0.902	0.839	2.01596	1.08726e-258	0.063
GLRX3	NPC	0.896	0.833	0.644236	3.69163e-170	0.063
OLA1	NPC	0.879	0.816	2.22524	2.42446e-131	0.063
TFG	NPC	0.778	0.715	0.468609	9.18932e-92	0.063
NDUFV2	NPC	0.399	0.336	0.621516	2.71503e-11	0.063
TBX2	NPC	0.144	0.081	0.444066	2.73172e-25	0.063
TPR	NPC	0.893	0.831	2.47602	9.80549e-117	0.062
MRPL57	NPC	0.949	0.887	0.864972	0	0.062
FAM174C	NPC	0.846	0.784	0.461575	1.82114e-102	0.062
ZNF593	NPC	0.85	0.788	0.837575	2.44504e-82	0.062
MRPL54	NPC	0.877	0.816	0.72953	3.02498e-158	0.061
PSMA1	NPC	0.958	0.897	1.86297	0	0.061
ASPH	NPC	0.943	0.882	7.30898	1.66981e-212	0.061
NCBP2	NPC	0.707	0.646	0.311363	5.96769e-21	0.061
RPL7L1	NPC	0.904	0.844	1.51918	6.40749e-181	0.06
DCUN1D5	NPC	0.881	0.821	0.462436	2.90316e-119	0.06
PTHLH	NPC	0.157	0.097	1.27877	6.91798e-20	0.06
ATP6V1D	NPC	0.87	0.81	0.419268	1.00551e-90	0.06
CSNK2B	NPC	0.76	0.701	1.09445	1.89088e-47	0.059
NEFH	NPC	0.112	0.053	0.302305	6.83901e-54	0.059
ADA	NPC	0.122	0.063	0.349809	4.78811e-46	0.059
UBE2S	NPC	0.994	0.935	11.6952	0	0.059
TOMM22	NPC	0.951	0.892	0.764683	3.55761e-302	0.059
CNIH4	NPC	0.844	0.785	1.38206	1.43275e-88	0.059
RBM25	NPC	0.908	0.85	0.510089	1.06559e-105	0.058
RGS17	NPC	0.234	0.176	0.410777	5.1974e-08	0.058
EPRS	NPC	0.83	0.772	1.06658	3.88713e-107	0.058
PSMA5	NPC	0.899	0.842	1.69782	0	0.057
XPO1	NPC	0.872	0.815	4.73714	8.00365e-31	0.057
ACP1	NPC	0.901	0.845	0.815421	4.44129e-182	0.056
CUL4B	NPC	0.315	0.259	1.0625	2.52645e-09	0.056
SRSF7	NPC	0.973	0.917	3.78803	0	0.056
CCT8	NPC	0.972	0.916	1.64982	0	0.056
HIST1H4C	NPC	0.918	0.863	31.2234	0	0.055
SDF2L1	NPC	0.884	0.829	12.4705	5.63876e-156	0.055
EIF3D	NPC	0.882	0.827	0.615123	1.23766e-91	0.055
ID1	NPC	0.896	0.841	2.25267	2.0629e-16	0.055
VPS26A	NPC	0.666	0.611	0.2749	0.000409078	0.055
EIF4EBP1	NPC	0.956	0.902	8.02288	3.44285e-302	0.054
ZC3H15	NPC	0.938	0.884	1.46779	4.56672e-150	0.054
HMGN2	NPC	0.999	0.946	8.11644	0	0.053
UBE2M	NPC	0.951	0.898	0.810224	0	0.053
PSMD1	NPC	0.926	0.874	0.571749	5.17339e-161	0.052
NAA10	NPC	0.903	0.851	0.472938	3.65603e-142	0.052
SELENOS	NPC	0.846	0.794	10.1617	5.12053e-54	0.052
HSPA4	NPC	0.841	0.79	0.877679	2.16934e-55	0.051
VTI1A	NPC	0.241	0.191	1.48591	1.63816e-07	0.05
PSMC5	NPC	0.947	0.897	2.48094	4.36907e-292	0.05
XRCC6	NPC	0.963	0.914	2.56493	2.03061e-250	0.049
NOL7	NPC	0.961	0.912	0.523927	7.07831e-227	0.049
RBM39	NPC	0.928	0.88	0.661643	2.76169e-113	0.048
NDUFS2	NPC	0.757	0.709	0.45891	1.37847e-10	0.048
GTF2A2	NPC	0.945	0.897	0.932351	0	0.048
POLR2B	NPC	0.628	0.581	2.02645	0.0338769	0.047
ALMS1	NPC	0.175	0.128	0.253274	3.65743e-23	0.047
DDX21	NPC	0.939	0.892	0.829475	9.71318e-75	0.047
CCDC47	NPC	0.646	0.6	1.78306	1.16011e-07	0.046
HTATIP2	NPC	0.442	0.396	0.487735	1	0.046
ANXA7	NPC	0.714	0.668	0.264074	1.75993e-13	0.046
SLC4A7	NPC	0.6	0.554	0.716419	0.000753042	0.046
HRH1	NPC	0.202	0.157	0.253299	2.20398e-14	0.045
DNAJC7	NPC	0.854	0.809	0.382551	1.00655e-38	0.045
PRDX4	NPC	0.916	0.872	0.801487	2.92641e-217	0.044
ADD3	NPC	0.447	0.403	2.81161	1	0.044
ARF1	NPC	0.963	0.919	0.566624	0	0.044
PRPF40A	NPC	0.935	0.892	2.8735	3.398e-170	0.043
CHURC1	NPC	0.628	0.585	0.329051	1	0.043
LSM3	NPC	0.972	0.929	3.90384	2.69883e-289	0.043
DNAJB6	NPC	0.901	0.859	1.04077	3.21123e-107	0.042
UBXN1	NPC	0.868	0.826	4.6616	4.65243e-60	0.042
RAP1B	NPC	0.97	0.928	6.02117	0	0.042
PRMT1	NPC	0.97	0.928	2.16894	0	0.042
LSM4	NPC	0.973	0.931	3.88808	3.1426e-281	0.042
SRM	NPC	0.985	0.944	14.3737	0	0.041
BCLAF1	NPC	0.91	0.869	0.723519	4.38287e-76	0.041
PSMB2	NPC	0.954	0.913	2.76417	0	0.041
UQCRFS1	NPC	0.936	0.896	2.75206	0	0.04
CCT4	NPC	0.985	0.945	1.71234	0	0.04
CCT5	NPC	0.981	0.941	0.429712	0	0.04
YTHDC1	NPC	0.623	0.583	2.38719	1	0.04
CCT2	NPC	0.984	0.945	3.15978	0	0.039
TMCO1	NPC	0.856	0.817	0.271218	9.32474e-50	0.039
USP14	NPC	0.886	0.847	0.376957	1.27435e-48	0.039
SRSF5	NPC	0.808	0.769	0.504334	7.52162e-29	0.039
SLC38A5	NPC	0.192	0.153	0.71541	8.93846e-16	0.039
PHB2	NPC	0.948	0.909	2.84461	2.0171e-281	0.039
KRT18	NPC	0.95	0.911	101.931	4.89162e-21	0.039
PABPN1	NPC	0.859	0.821	0.777929	9.90034e-23	0.038
PSMA3	NPC	0.968	0.93	8.13287	1.27281e-192	0.038
ATP5PB	NPC	0.886	0.849	1.06986	8.68534e-72	0.037
PSMB7	NPC	0.963	0.926	0.667063	0	0.037
ANKRD11	NPC	0.939	0.902	14.4416	3.52109e-73	0.037
PLAU	NPC	0.724	0.76	10.4329	1.03835e-05	0.036
C11orf58	NPC	0.967	0.931	0.495216	5.75788e-291	0.036
EIF4G1	NPC	0.93	0.895	0.590869	2.13841e-84	0.035
SNF8	NPC	0.909	0.874	0.372631	1.63039e-70	0.035
WBP2	NPC	0.337	0.302	2.63333	1	0.035
UBE2L3	NPC	0.967	0.933	1.83616	0	0.034
REXO2	NPC	0.938	0.904	4.97389	8.53803e-115	0.034
MRPL20	NPC	0.983	0.95	2.97556	0	0.033
SLC25A5	NPC	0.981	0.948	1.07156	0	0.033
CIAO2B	NPC	0.932	0.899	0.62993	1.60626e-234	0.033
CYB5D2	NPC	0.167	0.134	0.766059	1.85623e-07	0.033
PRDM4	NPC	0.217	0.184	0.7753	0.118192	0.033
RBM8A	NPC	0.982	0.95	2.82258	0	0.032
UBE2D2	NPC	0.916	0.884	0.861777	1.69457e-119	0.032
UHMK1	NPC	0.606	0.574	1.65702	1	0.032
SMG1	NPC	0.531	0.563	0.422853	3.08717e-13	0.032
EIF2S2	NPC	0.975	0.944	0.692148	6.70055e-176	0.031
REEP5	NPC	0.858	0.827	0.943383	6.06809e-100	0.031
TARS	NPC	0.865	0.834	0.673027	1.10122e-19	0.031
PSMB6	NPC	0.978	0.948	1.19993	1.82537e-292	0.03
CBX3	NPC	0.98	0.95	0.480271	8.58969e-236	0.03
AKIRIN1	NPC	0.718	0.688	0.283945	1	0.03
EIF3H	NPC	0.877	0.848	0.759847	1.50829e-66	0.029
UBE2I	NPC	0.97	0.942	1.98505	1.43367e-284	0.028
RSL24D1	NPC	0.892	0.864	1.92525	3.26448e-20	0.028
NDUFB10	NPC	0.97	0.943	1.42765	0	0.027
MLF2	NPC	0.91	0.883	0.851111	1.0085e-55	0.027
SPCS1	NPC	0.955	0.928	2.24721	0	0.027
TRMT112	NPC	0.966	0.94	5.06259	0	0.026
C1QBP	NPC	0.993	0.967	3.77456	0	0.026
SPAG9	NPC	0.646	0.672	0.622234	2.80298e-11	0.026
HNRNPDL	NPC	0.984	0.959	1.58662	0	0.025
NDUFB4	NPC	0.929	0.904	2.14172	7.5051e-33	0.025
NME2	NPC	0.324	0.349	0.576439	3.88716e-08	0.025
BANF1	NPC	0.986	0.962	0.856637	0	0.024
PSMB5	NPC	0.975	0.952	7.54022	0	0.023
PFDN2	NPC	0.989	0.966	2.34177	0	0.023
IER3	NPC	0.953	0.93	8.22556	1.93997e-119	0.023
SNRPB	NPC	0.995	0.973	0.342249	0	0.022
EIF5	NPC	0.976	0.954	6.16233	2.66249e-244	0.022
HIF1A	NPC	0.89	0.868	0.828098	1	0.022
PSMD8	NPC	0.977	0.956	3.22185	0	0.021
TBCA	NPC	0.988	0.967	4.82293	6.42335e-282	0.021
SRP9	NPC	0.98	0.959	0.81873	3.29458e-197	0.021
CCT6A	NPC	0.99	0.97	5.67484	0	0.02
MRPL51	NPC	0.986	0.966	0.655654	0	0.02
GDF15	NPC	0.147	0.127	11.0404	2.10897e-19	0.02
NHP2	NPC	0.973	0.954	0.886177	5.05759e-59	0.019
TRAF5	NPC	0.121	0.102	0.408566	0.235209	0.019
CCT3	NPC	0.991	0.973	3.93448	0	0.018
SNU13	NPC	0.99	0.972	0.959083	0	0.018
TALDO1	NPC	0.964	0.946	2.35659	5.18595e-112	0.018
VDAC2	NPC	0.979	0.962	0.45409	0	0.017
SNRPG	NPC	0.997	0.98	0.259575	1.98844e-272	0.017
COX5A	NPC	0.958	0.941	1.89281	1.44714e-188	0.017
HERPUD1	NPC	0.551	0.568	3.67132	0.0467548	0.017
PSMB1	NPC	0.988	0.972	3.23021	0	0.016
GARS	NPC	0.771	0.755	1.82644	4.49074e-14	0.016
EID1	NPC	0.994	0.979	4.98622	0	0.015
SEPTIN7	NPC	0.994	0.979	2.31756	1.95504e-125	0.015
TOMM7	NPC	0.989	0.975	6.80486	1.49419e-78	0.014
HNRNPA3	NPC	0.992	0.978	3.13608	3.88205e-56	0.014
GDI2	NPC	0.964	0.95	0.59669	3.0031e-34	0.014
TUBA1C	NPC	0.997	0.984	0.87966	0	0.013
C19orf53	NPC	0.99	0.977	5.93747	4.63556e-293	0.013
NCL	NPC	0.999	0.986	2.01907	2.65681e-276	0.013
HDLBP	NPC	0.937	0.924	1.58819	9.20869e-31	0.013
NXPE3	NPC	0.195	0.206	29.1863	1	0.011
HNRNPA1	NPC	0.998	0.988	1.24667	1.87135e-254	0.01
PCBP1	NPC	0.965	0.955	1.93775	5.0316e-62	0.01
AHNAK	NPC	0.966	0.956	0.880364	0.200122	0.01
COX8A	NPC	0.995	0.986	1.66529	7.27097e-129	0.009
PDIA4	NPC	0.869	0.86	0.250147	1.94893e-22	0.009
H2AFZ	NPC	1	0.992	2.38468	0	0.008
AIDA	NPC	0.594	0.586	0.47115	1	0.008
UFM1	NPC	0.758	0.75	6.35702	1	0.008
HNRNPA2B1	NPC	0.999	0.992	1.86049	0	0.007
ATP5MC2	NPC	0.996	0.989	1.21504	0	0.007
HSPA5	NPC	0.98	0.973	137.546	2.10689e-120	0.007
YBX3	NPC	0.908	0.914	0.394402	1	0.006
PCBP2	NPC	0.985	0.98	0.756184	5.93243e-58	0.005
BAX	NPC	0.936	0.931	1.61342	1.20397e-15	0.005
BRK1	NPC	0.964	0.968	17.7014	3.69047e-20	0.004
HSP90AB1	NPC	1	0.997	31.8677	0	0.003
PSMA7	NPC	1	0.997	2.31875	0	0.003
SLC6A8	NPC	0.224	0.227	1.69761	1	0.003
NPM1	NPC	1	0.998	50.925	0	0.002
ARPC3	NPC	0.986	0.988	5.16086	2.53566e-69	0.002
BTF3	NPC	1	0.999	29.7478	0	0.001
RAN	NPC	1	0.999	26.4292	0	0.001
RPL4	NPC	1	0.999	0.579627	0	0.001
RPL27	NPC	1	1	5.3396	0	0
SLC25A3	NPC	0.999	0.999	0.906826	1.92118e-283	0
RPS14	NPC	1	1	34.1238	1.06818e-216	0
RPL15	NPC	1	1	23.5732	3.457e-209	0
YWHAB	NPC	0.999	0.999	0.625114	3.44971e-106	0
RPL37A	NPC	1	1	5.29476	8.97647e-40	0
FXYD2	RTEC1	0.614	0.144	5.98238	0	0.47
DCDC2	RTEC1	0.824	0.359	1.56987	0	0.465
TINAG	RTEC1	0.519	0.161	3.84304	0	0.358
MT1F	RTEC1	0.486	0.146	9.60347	0	0.34
LAMC2	RTEC1	0.714	0.377	3.01147	7.41095e-185	0.337
CXCL1	RTEC1	0.59	0.259	5.45418	0	0.331
PAX8	RTEC1	0.729	0.398	0.314839	0	0.331
NNMT	RTEC1	0.903	0.587	32.9353	0	0.316
HNF1B	RTEC1	0.489	0.182	1.72958	0	0.307
LIMCH1	RTEC1	0.397	0.093	8.71087	0	0.304
ANXA4	RTEC1	0.714	0.419	26.6945	0	0.295
SPNS2	RTEC1	0.417	0.134	0.821125	0	0.283
TFAP2B	RTEC1	0.331	0.049	3.71247	0	0.282
MT1M	RTEC1	0.422	0.14	7.09032	0	0.282
PLEKHA1	RTEC1	0.598	0.322	2.4409	0	0.276
IL18	RTEC1	0.424	0.163	1.00421	0	0.261
GPRC5C	RTEC1	0.37	0.112	6.44484	0	0.258
MFHAS1	RTEC1	0.602	0.353	1.79189	0	0.249
NEDD4L	RTEC1	0.622	0.375	1.40287	3.8825e-278	0.247
MTSS1	RTEC1	0.461	0.215	0.958867	1.73724e-283	0.246
INAVA	RTEC1	0.41	0.167	1.5382	0	0.243
COL18A1	RTEC1	0.797	0.555	7.82245	0	0.242
GLDC	RTEC1	0.441	0.203	1.67389	1.79219e-292	0.238
CLEC4E	RTEC1	0.328	0.092	4.08954	0	0.236
WWC1	RTEC1	0.483	0.248	5.0621	2.07952e-260	0.235
POU3F3	RTEC1	0.34	0.106	0.801116	0	0.234
GFRA1	RTEC1	0.42	0.188	1.29852	3.12458e-230	0.232
GALNT14	RTEC1	0.413	0.182	0.907271	1.21131e-226	0.231
SLCO4A1	RTEC1	0.45	0.222	1.67434	1.20035e-298	0.228
UGT2B7	RTEC1	0.386	0.16	0.565664	1.57589e-245	0.226
L1CAM	RTEC1	0.286	0.061	1.24582	0	0.225
RHOF	RTEC1	0.599	0.375	6.33832	8.42096e-169	0.224
DENND2A	RTEC1	0.323	0.101	1.74911	0	0.222
CITED4	RTEC1	0.648	0.427	7.20267	0	0.221
PDZK1IP1	RTEC1	0.332	0.114	5.44532	0	0.218
COBLL1	RTEC1	0.464	0.247	0.31228	1.20685e-213	0.217
SEMA4B	RTEC1	0.391	0.176	1.16676	0	0.215
ANPEP	RTEC1	0.552	0.342	2.2146	1.42573e-222	0.21
KLHL13	RTEC1	0.349	0.139	1.0751	0	0.21
SYCE1L	RTEC1	0.423	0.215	1.6739	3.04858e-259	0.208
NRG1	RTEC1	0.595	0.387	0.313859	4.20452e-197	0.208
TPD52L1	RTEC1	0.49	0.284	0.97633	1.62015e-140	0.206
LAD1	RTEC1	0.274	0.069	0.349203	3.37065e-287	0.205
KCNJ15	RTEC1	0.322	0.117	0.438997	5.43922e-266	0.205
PRICKLE1	RTEC1	0.432	0.227	0.82627	2.00507e-219	0.205
NFKBIZ	RTEC1	0.49	0.287	0.682204	1.32127e-213	0.203
LRATD2	RTEC1	0.335	0.134	1.11107	1.60618e-209	0.201
AIG1	RTEC1	0.57	0.369	1.98183	7.27766e-292	0.201
QPRT	RTEC1	0.491	0.291	11.078	5.72014e-93	0.2
IMPA2	RTEC1	0.419	0.219	3.69212	0	0.2
TNIP1	RTEC1	0.743	0.543	5.66656	3.02803e-281	0.2
SGPP2	RTEC1	0.255	0.056	0.8992	0	0.199
SLC2A1	RTEC1	0.654	0.455	1.57148	2.25506e-298	0.199
LRRC61	RTEC1	0.419	0.22	1.27337	1.92958e-209	0.199
HOXD10	RTEC1	0.298	0.102	0.9233	1.80118e-300	0.196
MAPKAPK3	RTEC1	0.526	0.33	1.2355	3.83875e-287	0.196
PLCB4	RTEC1	0.458	0.262	1.2381	1.7023e-140	0.196
SMOX	RTEC1	0.457	0.266	1.40363	1.54435e-206	0.191
SLC26A2	RTEC1	0.517	0.327	19.218	1.376e-257	0.19
HSPG2	RTEC1	0.574	0.384	9.67889	1.23767e-261	0.19
OTUB2	RTEC1	0.271	0.082	0.803572	0	0.189
UGCG	RTEC1	0.866	0.678	2.71391	0	0.188
TRNP1	RTEC1	0.498	0.311	0.628666	1.44044e-160	0.187
AGRN	RTEC1	0.618	0.432	1.87414	8.2634e-253	0.186
CARMIL1	RTEC1	0.362	0.177	0.810575	5.66465e-198	0.185
SPON1	RTEC1	0.275	0.091	1.72381	2.61008e-291	0.184
EFNA5	RTEC1	0.402	0.22	0.900622	2.61726e-187	0.182
LAMA5	RTEC1	0.347	0.165	1.13366	2.38086e-239	0.182
PATJ	RTEC1	0.304	0.125	0.471737	1.17906e-225	0.179
CDK2AP2	RTEC1	0.813	0.635	2.81906	0	0.178
PMEPA1	RTEC1	0.838	0.66	3.57536	6.10626e-222	0.178
PTBP3	RTEC1	0.761	0.585	0.911308	1.76212e-283	0.176
CCDC198	RTEC1	0.291	0.117	0.517441	2.57401e-189	0.174
RBPMS	RTEC1	0.65	0.477	0.99424	1.657e-159	0.173
SLC39A4	RTEC1	0.488	0.315	4.01179	9.76255e-150	0.173
IL23A	RTEC1	0.248	0.076	1.03435	3.79109e-244	0.172
RHOB	RTEC1	0.549	0.378	2.24061	8.75299e-218	0.171
STAT1	RTEC1	0.651	0.481	0.433618	3.70611e-240	0.17
MECOM	RTEC1	0.3	0.131	1.40364	2.20364e-224	0.169
EFNA1	RTEC1	0.205	0.038	2.39475	0	0.167
KITLG	RTEC1	0.481	0.314	0.389026	4.4721e-106	0.167
COL7A1	RTEC1	0.56	0.394	1.0958	1.72006e-222	0.166
SEMA3C	RTEC1	0.598	0.432	0.731075	7.21226e-240	0.166
HKDC1	RTEC1	0.297	0.131	0.678047	2.74285e-176	0.166
S100A2	RTEC1	0.656	0.491	126.641	2.3184e-30	0.165
HSPA12A	RTEC1	0.345	0.181	0.717384	5.00393e-171	0.164
MOXD1	RTEC1	0.37	0.207	0.781875	4.06217e-143	0.163
HAS3	RTEC1	0.25	0.088	0.631092	6.67852e-218	0.162
AK4	RTEC1	0.358	0.198	1.0828	1.2128e-163	0.16
PARD3	RTEC1	0.563	0.403	1.11667	2.06408e-159	0.16
FUT8	RTEC1	0.535	0.377	1.21608	1.19695e-207	0.158
SEMA6A	RTEC1	0.225	0.067	0.529761	7.65482e-220	0.158
TOX3	RTEC1	0.222	0.065	0.363132	1.53758e-237	0.157
ADAMTS5	RTEC1	0.218	0.062	22.4474	4.39252e-233	0.156
CXADR	RTEC1	0.327	0.177	0.713571	8.8727e-142	0.15
NRK	RTEC1	0.327	0.179	0.460625	2.4307e-111	0.148
TMEM51	RTEC1	0.373	0.225	0.667705	2.874e-123	0.148
ISYNA1	RTEC1	0.396	0.249	0.763144	1.7083e-131	0.147
MGST2	RTEC1	0.525	0.379	2.69233	1.60677e-86	0.146
CNDP2	RTEC1	0.707	0.561	0.302859	4.77073e-145	0.146
TAPBP	RTEC1	0.681	0.536	4.80951	2.90549e-199	0.145
PHYHD1	RTEC1	0.209	0.064	0.727129	2.95088e-262	0.145
CD2AP	RTEC1	0.715	0.571	0.670755	2.53191e-165	0.144
PPP1R14C	RTEC1	0.361	0.217	1.39316	1.94526e-83	0.144
MT1X	RTEC1	0.64	0.497	4.45629	1.23244e-133	0.143
SLC25A13	RTEC1	0.532	0.389	0.634933	4.24027e-115	0.143
LGR4	RTEC1	0.303	0.16	0.740649	1.28269e-156	0.143
STX3	RTEC1	0.366	0.223	0.579373	1.25819e-114	0.143
BICD1	RTEC1	0.485	0.343	1.1926	2.65678e-142	0.142
CPVL	RTEC1	0.235	0.094	0.577126	8.34137e-187	0.141
ABLIM1	RTEC1	0.256	0.116	1.19058	6.84113e-163	0.14
EGFL7	RTEC1	0.379	0.239	1.42758	3.05571e-153	0.14
SLC35F5	RTEC1	0.518	0.378	1.12612	4.13746e-134	0.14
SALL1	RTEC1	0.282	0.142	0.576546	1.59838e-155	0.14
MYO6	RTEC1	0.483	0.343	1.10208	1.80268e-101	0.14
LRRN4	RTEC1	0.274	0.135	0.465479	1.07969e-128	0.139
PPP1R9A	RTEC1	0.324	0.185	0.474312	3.78181e-109	0.139
HOOK1	RTEC1	0.239	0.1	0.958853	2.93694e-155	0.139
MICAL3	RTEC1	0.349	0.21	0.412236	1.0563e-128	0.139
TRIM47	RTEC1	0.371	0.232	0.769753	1.58259e-111	0.139
MVP	RTEC1	0.57	0.431	2.31272	3.35401e-148	0.139
COMTD1	RTEC1	0.477	0.338	0.453911	2.1978e-81	0.139
PLS1	RTEC1	0.278	0.141	0.460798	4.00106e-140	0.137
TOM1L1	RTEC1	0.348	0.212	0.801119	1.29854e-128	0.136
CLDN16	RTEC1	0.165	0.03	1.74458	1.76412e-245	0.135
SVIL	RTEC1	0.743	0.608	1.10654	1.52739e-227	0.135
GCNT2	RTEC1	0.242	0.107	0.398867	1.6417e-147	0.135
PARD6B	RTEC1	0.265	0.131	0.513846	4.72287e-132	0.134
KCTD1	RTEC1	0.274	0.141	0.491081	5.98023e-147	0.133
HOXD4	RTEC1	0.25	0.117	0.442661	1.17826e-142	0.133
PROSER2	RTEC1	0.329	0.196	0.708832	1.29547e-88	0.133
CYS1	RTEC1	0.156	0.025	2.32034	0	0.131
TNF	RTEC1	0.158	0.027	0.892636	3.90049e-253	0.131
ABCC4	RTEC1	0.377	0.246	0.460866	4.52632e-105	0.131
MAP3K1	RTEC1	0.305	0.174	0.302699	1.85746e-103	0.131
KIF12	RTEC1	0.167	0.037	0.666726	9.52148e-277	0.13
ARHGAP26	RTEC1	0.236	0.106	0.472321	8.60275e-156	0.13
PML	RTEC1	0.434	0.304	0.661514	1.28269e-110	0.13
ZNF608	RTEC1	0.313	0.184	0.653648	4.89402e-112	0.129
TMEM205	RTEC1	0.548	0.42	1.95851	1.50231e-121	0.128
PTPN3	RTEC1	0.258	0.13	0.427758	2.79972e-131	0.128
PTPRJ	RTEC1	0.361	0.233	0.866505	1.03117e-113	0.128
ECE1	RTEC1	0.535	0.408	2.46761	3.52021e-131	0.127
QPCT	RTEC1	0.28	0.154	0.492757	7.99449e-120	0.126
AKR1C3	RTEC1	0.19	0.064	6.71681	1.56746e-156	0.126
CMTM3	RTEC1	0.624	0.498	5.56705	1.07314e-123	0.126
IRF1	RTEC1	0.372	0.246	1.12049	1.23686e-91	0.126
PLEK2	RTEC1	0.537	0.412	2.37953	1.38357e-76	0.125
CDH4	RTEC1	0.273	0.148	0.564727	2.16543e-103	0.125
ZFHX3	RTEC1	0.507	0.382	0.379399	2.7768e-107	0.125
KIRREL1	RTEC1	0.407	0.282	0.53696	4.37735e-100	0.125
ELF1	RTEC1	0.389	0.264	0.659842	3.54913e-76	0.125
PSME1	RTEC1	0.88	0.756	3.76055	0	0.124
FGD6	RTEC1	0.361	0.237	0.431688	2.10008e-81	0.124
FRMD4B	RTEC1	0.239	0.115	0.47072	2.64948e-122	0.124
SFRP1	RTEC1	0.537	0.414	9.92627	5.32187e-137	0.123
DOC2B	RTEC1	0.198	0.075	0.347105	6.05557e-135	0.123
MGLL	RTEC1	0.692	0.569	0.59927	3.39188e-157	0.123
NTN4	RTEC1	0.253	0.13	6.75261	3.96316e-99	0.123
DAPK1	RTEC1	0.27	0.148	0.565105	6.59589e-101	0.122
PCBD1	RTEC1	0.917	0.795	2.76355	7.3718e-263	0.122
CSF2	RTEC1	0.151	0.03	16.9676	2.50771e-182	0.121
NDUFA13	RTEC1	0.731	0.61	0.400259	7.03911e-167	0.121
SYT14	RTEC1	0.222	0.101	0.461273	1.4585e-129	0.121
ALPK3	RTEC1	0.242	0.121	0.435944	1.78203e-92	0.121
GJA1	RTEC1	0.311	0.432	3.87785	1.36652e-60	0.121
TRIM55	RTEC1	0.192	0.072	0.811249	6.76969e-154	0.12
MINDY2	RTEC1	0.453	0.333	1.74119	5.95651e-88	0.12
ARHGEF28	RTEC1	0.401	0.282	0.313892	3.81434e-59	0.119
CRB3	RTEC1	0.193	0.075	0.357432	1.48113e-118	0.118
SIM2	RTEC1	0.152	0.034	0.69412	2.07939e-205	0.118
GJC1	RTEC1	0.523	0.407	0.632515	5.32525e-68	0.116
IL6	RTEC1	0.156	0.04	5.23916	6.32905e-169	0.116
LIPG	RTEC1	0.204	0.088	0.591142	3.64131e-132	0.116
SHKBP1	RTEC1	0.511	0.395	1.23654	1.17954e-116	0.116
MITF	RTEC1	0.385	0.269	0.27479	3.85727e-24	0.116
KIAA1217	RTEC1	0.287	0.171	0.515363	1.27298e-99	0.116
LOXL2	RTEC1	0.781	0.666	2.56525	1.586e-299	0.115
JPT2	RTEC1	0.762	0.647	0.849702	4.89608e-163	0.115
NHS	RTEC1	0.238	0.123	0.386246	1.39287e-113	0.115
CHMP4C	RTEC1	0.254	0.139	0.311272	5.36416e-88	0.115
MTCL1	RTEC1	0.371	0.256	0.52048	4.28531e-79	0.115
PARP14	RTEC1	0.429	0.314	0.389547	1.81007e-60	0.115
CDKN1C	RTEC1	0.265	0.151	3.96466	1.05277e-92	0.114
HOXD11	RTEC1	0.208	0.094	0.682754	6.43003e-94	0.114
UHRF1	RTEC1	0.483	0.597	0.600211	1.7173e-45	0.114
DMTN	RTEC1	0.17	0.057	0.448398	1.83272e-165	0.113
HOXD8	RTEC1	0.241	0.128	0.500518	1.80864e-113	0.113
ANGPTL4	RTEC1	0.394	0.507	5.83837	2.91669e-77	0.113
LFNG	RTEC1	0.287	0.174	0.452453	7.89197e-65	0.113
IDI1	RTEC1	0.394	0.506	3.06716	1.07714e-111	0.112
B3GALT5	RTEC1	0.214	0.103	0.395771	1.31923e-111	0.111
CYSTM1	RTEC1	0.593	0.482	2.34969	1.51425e-82	0.111
KPNA4	RTEC1	0.659	0.77	4.53477	3.15286e-67	0.111
RCAN3	RTEC1	0.282	0.171	0.380708	4.75187e-91	0.111
RRAD	RTEC1	0.221	0.111	3.80033	8.88972e-48	0.11
ARRDC1	RTEC1	0.304	0.194	0.316724	1.68964e-80	0.11
SPHK1	RTEC1	0.396	0.505	0.597417	3.16738e-83	0.109
DOP1B	RTEC1	0.322	0.214	0.296305	8.39421e-68	0.108
CYBA	RTEC1	0.993	0.885	1.69132	0	0.108
KCNJ16	RTEC1	0.142	0.034	1.20738	7.12406e-182	0.108
IGSF3	RTEC1	0.172	0.064	0.381015	1.73134e-146	0.108
LIMD2	RTEC1	0.811	0.705	2.72362	5.24718e-242	0.106
EMX2	RTEC1	0.193	0.087	0.487917	1.62407e-116	0.106
ELMSAN1	RTEC1	0.316	0.21	0.47774	2.9223e-84	0.106
MYLK	RTEC1	0.648	0.542	2.3994	8.70127e-78	0.106
TMEM92	RTEC1	0.167	0.062	0.485214	5.34396e-143	0.105
S100A3	RTEC1	0.241	0.136	1.92814	5.27149e-94	0.105
GSDMD	RTEC1	0.425	0.32	0.633023	2.73085e-64	0.105
FGFR4	RTEC1	0.153	0.049	0.39928	9.21426e-155	0.104
ARHGAP27	RTEC1	0.213	0.11	0.35412	2.44677e-83	0.103
OPTN	RTEC1	0.617	0.514	1.15782	8.8016e-93	0.103
TMEM14A	RTEC1	0.563	0.46	0.476531	1.6676e-74	0.103
SIGIRR	RTEC1	0.538	0.436	3.28865	4.47258e-126	0.102
GCA	RTEC1	0.264	0.162	0.260313	1.04839e-65	0.102
PCSK5	RTEC1	0.148	0.046	0.47342	2.39374e-163	0.102
KLHL36	RTEC1	0.387	0.286	0.426929	1.66192e-66	0.101
TLCD4	RTEC1	0.203	0.102	0.271355	8.90429e-82	0.101
CCNG2	RTEC1	0.207	0.106	0.467623	3.04302e-112	0.101
RELB	RTEC1	0.365	0.264	0.283793	1.37927e-53	0.101
SEPTIN6	RTEC1	0.369	0.268	0.273454	3.12333e-53	0.101
FBN1	RTEC1	0.668	0.569	21.1777	3.45799e-251	0.099
CELSR1	RTEC1	0.159	0.06	0.285967	1.33892e-118	0.099
CNKSR3	RTEC1	0.231	0.132	0.278622	3.32184e-73	0.099
RBP7	RTEC1	0.221	0.122	7.25665	1.71992e-48	0.099
ARMT1	RTEC1	0.499	0.4	0.75043	2.17758e-60	0.099
RAB9A	RTEC1	0.391	0.293	0.734899	6.44023e-63	0.098
EPHX4	RTEC1	0.198	0.1	0.302958	8.6214e-100	0.098
CBR3	RTEC1	0.416	0.318	3.29465	1.5131e-114	0.098
HSPA13	RTEC1	0.26	0.358	1.76757	1.75138e-59	0.098
TMED10	RTEC1	0.698	0.795	0.257243	6.46796e-93	0.097
AP1G2	RTEC1	0.183	0.086	0.299572	5.67389e-99	0.097
HOXD9	RTEC1	0.192	0.095	0.395706	1.06815e-98	0.097
SPAG1	RTEC1	0.256	0.159	0.31309	1.53883e-66	0.097
MAP7D1	RTEC1	0.632	0.729	0.692848	9.6202e-18	0.097
HRAS	RTEC1	0.764	0.861	4.2453	7.30369e-09	0.097
FOXE1	RTEC1	0.114	0.018	0.413028	5.09929e-216	0.096
MRS2	RTEC1	0.394	0.299	0.651511	1.03242e-56	0.095
ADAMTS1	RTEC1	0.39	0.295	1.15242	2.24083e-35	0.095
F11R	RTEC1	0.17	0.075	0.268038	5.56369e-82	0.095
SYTL1	RTEC1	0.159	0.064	0.718704	5.8281e-105	0.095
MGMT	RTEC1	0.603	0.508	4.67552	3.10306e-102	0.095
NIT2	RTEC1	0.637	0.542	1.0909	1.11818e-71	0.095
KDM5B	RTEC1	0.486	0.391	0.328925	1.20561e-51	0.095
MYO1E	RTEC1	0.416	0.321	0.543962	3.20416e-48	0.095
FAS	RTEC1	0.28	0.186	0.342964	5.45117e-66	0.094
ZFYVE21	RTEC1	0.518	0.425	0.76622	4.07943e-77	0.093
TIFA	RTEC1	0.25	0.157	0.286214	5.31946e-62	0.093
CFH	RTEC1	0.024	0.116	13.175	3.78298e-124	0.092
PET100	RTEC1	0.551	0.46	2.04274	6.25848e-89	0.091
SHTN1	RTEC1	0.384	0.293	0.616859	1.14607e-32	0.091
TMEM139	RTEC1	0.137	0.046	0.451502	5.05979e-128	0.091
SLC39A10	RTEC1	0.638	0.547	0.732492	1.51893e-111	0.091
P4HA2	RTEC1	0.45	0.36	2.64422	2.23549e-63	0.09
HIP1R	RTEC1	0.212	0.122	0.319852	5.62028e-72	0.09
PRRG1	RTEC1	0.23	0.14	0.378948	4.77576e-70	0.09
NMI	RTEC1	0.305	0.215	0.418402	2.4289e-54	0.09
ATP8A2	RTEC1	0.204	0.114	0.351954	2.46999e-75	0.09
PTPN13	RTEC1	0.292	0.202	0.276595	5.64178e-50	0.09
PGM1	RTEC1	0.36	0.27	0.360801	1.45049e-49	0.09
AL136164.3	RTEC1	0.234	0.145	0.309564	2.41955e-56	0.089
ECHDC2	RTEC1	0.265	0.176	0.304209	1.76802e-53	0.089
STK26	RTEC1	0.269	0.18	0.289488	3.72087e-53	0.089
DUSP23	RTEC1	0.556	0.467	0.792352	1.08292e-44	0.089
SYTL2	RTEC1	0.202	0.113	1.58728	6.05081e-51	0.089
BIK	RTEC1	0.118	0.029	0.323393	8.35176e-147	0.089
SRSF12	RTEC1	0.176	0.087	0.277778	3.98414e-82	0.089
NME2	RTEC1	0.421	0.332	1.61676	9.19514e-60	0.089
DHX36	RTEC1	0.654	0.743	0.338852	1.63896e-18	0.089
PSMB9	RTEC1	0.343	0.255	0.558271	9.88188e-52	0.088
ORMDL2	RTEC1	0.643	0.555	0.632113	2.51762e-66	0.088
TSPAN6	RTEC1	0.348	0.26	0.432697	3.87656e-47	0.088
PSMD6	RTEC1	0.582	0.669	0.948214	1.18838e-28	0.087
PITPNM1	RTEC1	0.272	0.185	1.26901	1.78024e-62	0.087
ITGB3	RTEC1	0.196	0.109	0.473078	7.64321e-67	0.087
ARHGEF35	RTEC1	0.184	0.097	0.307479	2.88113e-72	0.087
ARSD	RTEC1	0.226	0.139	0.440414	9.86769e-70	0.087
PTPRM	RTEC1	0.212	0.125	0.267672	1.89949e-68	0.087
TMEM256	RTEC1	0.611	0.524	1.63713	3.26329e-119	0.087
CDH13	RTEC1	0.575	0.488	1.48532	2.77354e-56	0.087
MAFG	RTEC1	0.294	0.38	0.346797	2.15529e-46	0.086
JADE1	RTEC1	0.502	0.416	0.357222	5.36362e-40	0.086
TNFAIP1	RTEC1	0.448	0.362	0.644331	5.59996e-40	0.086
MKNK2	RTEC1	0.387	0.301	0.293786	1.17635e-31	0.086
RETREG1	RTEC1	0.135	0.049	0.397522	1.06844e-108	0.086
RGS9	RTEC1	0.179	0.093	0.277548	2.54548e-85	0.086
SMAD3	RTEC1	0.478	0.392	1.18637	3.33587e-57	0.086
APBB1IP	RTEC1	0.136	0.051	0.326949	4.41181e-98	0.085
SEL1L3	RTEC1	0.271	0.186	0.293156	7.89745e-39	0.085
CAB39	RTEC1	0.468	0.383	4.69524	2.0666e-37	0.085
PPP1R3B	RTEC1	0.161	0.076	0.392677	3.55258e-97	0.085
PTER	RTEC1	0.188	0.103	0.455673	8.08786e-76	0.085
EPHB1	RTEC1	0.186	0.102	0.28525	7.40081e-64	0.084
DEPP1	RTEC1	0.118	0.034	0.726592	2.47401e-132	0.084
SIGLEC15	RTEC1	0.308	0.224	0.357969	1.79153e-29	0.084
SLC25A1	RTEC1	0.601	0.517	0.45379	4.63687e-47	0.084
EFHD1	RTEC1	0.134	0.051	0.338491	4.73425e-104	0.083
LMNB1	RTEC1	0.466	0.549	2.58407	1.98704e-09	0.083
TBXAS1	RTEC1	0.3	0.217	0.394775	1.36179e-32	0.083
DCAF6	RTEC1	0.416	0.333	0.535635	3.23248e-46	0.083
SLC25A29	RTEC1	0.285	0.202	0.406945	1.20642e-42	0.083
HSPA9	RTEC1	0.806	0.889	0.574799	1.89148e-33	0.083
TRIM2	RTEC1	0.221	0.139	1.62127	3.08122e-69	0.082
FLOT2	RTEC1	0.346	0.264	0.37173	1.68128e-42	0.082
COPA	RTEC1	0.659	0.741	1.05529	5.6797e-16	0.082
BTBD7	RTEC1	0.562	0.481	0.259512	6.02583e-41	0.081
TMEM30A	RTEC1	0.583	0.664	1.90087	6.98738e-15	0.081
GGCT	RTEC1	0.623	0.704	1.1846	2.28592e-15	0.081
CCNB1	RTEC1	0.719	0.799	16.5726	4.03576e-37	0.08
FHOD3	RTEC1	0.269	0.189	0.352859	4.24675e-51	0.08
CASK	RTEC1	0.385	0.305	0.26708	1.11287e-43	0.08
ARID3A	RTEC1	0.316	0.236	0.953685	7.69408e-43	0.08
NFKB2	RTEC1	0.28	0.2	0.58443	3.56413e-42	0.08
HOXD1	RTEC1	0.105	0.025	0.282143	9.52548e-149	0.08
KIF3C	RTEC1	0.244	0.164	0.379501	7.50814e-54	0.08
ECH1	RTEC1	0.559	0.48	1.75539	1.39288e-51	0.079
TMEM159	RTEC1	0.202	0.123	0.39597	5.02673e-65	0.079
DGKH	RTEC1	0.375	0.296	0.288852	4.50826e-44	0.079
PLEKHA5	RTEC1	0.432	0.353	0.33456	1.51761e-41	0.079
CTNND1	RTEC1	0.511	0.432	0.578416	2.6031e-41	0.079
RIPK2	RTEC1	0.387	0.308	0.449479	4.52825e-30	0.079
RRAS	RTEC1	0.755	0.676	0.653998	5.93608e-96	0.079
UBE2E2	RTEC1	0.41	0.331	0.458728	1.64682e-37	0.079
ZFP42	RTEC1	0.135	0.057	0.37003	2.93635e-79	0.078
TRAPPC6A	RTEC1	0.166	0.088	0.389267	2.45254e-66	0.078
PAM	RTEC1	0.405	0.327	1.6078	3.4088e-56	0.078
FAM241B	RTEC1	0.195	0.117	0.295173	4.51442e-50	0.078
MT1G	RTEC1	0.103	0.025	111.735	1.38103e-97	0.078
PTPRD	RTEC1	0.175	0.097	0.333925	4.87695e-58	0.078
ATP6V1D	RTEC1	0.753	0.831	0.336127	4.15752e-22	0.078
BCL10	RTEC1	0.549	0.472	0.967433	1.15412e-64	0.077
SINHCAF	RTEC1	0.557	0.48	0.406636	5.33723e-39	0.077
PTPA	RTEC1	0.504	0.427	0.565064	5.10897e-52	0.077
ASRGL1	RTEC1	0.322	0.245	2.35902	7.75341e-33	0.077
PSORS1C1	RTEC1	0.129	0.053	0.3603	9.60852e-96	0.076
SLC35D2	RTEC1	0.339	0.263	0.407073	5.67573e-41	0.076
GSDME	RTEC1	0.343	0.267	0.303001	1.05743e-31	0.076
CHRDL1	RTEC1	0.102	0.026	0.353668	7.27609e-134	0.076
SRGAP1	RTEC1	0.713	0.637	0.71411	3.54419e-84	0.076
CYREN	RTEC1	0.414	0.338	0.416356	6.43261e-30	0.076
[truncated: 13,146 more rows]
